# Supplementary material for: Cross-sectional survey of salt content in cheese: a major contributor to salt intake in the UK
Source: PubMed Central journal article supplement — BMJ Open. 2014 Aug 1;4(8):e005051. doi: 10.1136/bmjopen-2014-005051 (PMC4139634; doi:10.1136/bmjopen-2014-005051), 2014-08-01
Supplement: bmjopen-2014-005051.draft_revisions.pdf [file bmjopen-2014-005051.draft_revisions.pdf]

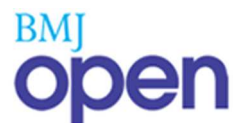

## Salt content in cheese – a major contributor to salt intake in the UK

|                                 |                                                                                                                                                                                                                                                                                                                                                                                                         |
|---------------------------------|---------------------------------------------------------------------------------------------------------------------------------------------------------------------------------------------------------------------------------------------------------------------------------------------------------------------------------------------------------------------------------------------------------|
| Journal:                        | <i>BMJ Open</i>                                                                                                                                                                                                                                                                                                                                                                                         |
| Manuscript ID:                  | bmjopen-2014-005051                                                                                                                                                                                                                                                                                                                                                                                     |
| Article Type:                   | Research                                                                                                                                                                                                                                                                                                                                                                                                |
| Date Submitted by the Author:   | 13-Feb-2014                                                                                                                                                                                                                                                                                                                                                                                             |
| Complete List of Authors:       | Hashem, Kawther; Queen Mary University of London, Wolfson Institute of Preventive Medicine<br>He, Feng; Queen Mary University of London, Wolfson Institute of Preventive Medicine<br>Jenner, Katharine; Queen Mary University of London, Wolfson Institute of Preventive Medicine<br>MacGregor, Graham; Barts and the London School of Medicine and Dentistry, Wolfson Institute of Preventive Medicine |
| <b>Primary Subject Heading</b>: | Public health                                                                                                                                                                                                                                                                                                                                                                                           |
| Secondary Subject Heading:      | Public health, Health policy                                                                                                                                                                                                                                                                                                                                                                            |
| Keywords:                       | Public health , NUTRITION & DIETETICS, PUBLIC HEALTH                                                                                                                                                                                                                                                                                                                                                    |
|                                 |                                                                                                                                                                                                                                                                                                                                                                                                         |

SCHOLARONE™  
Manuscripts

1  
2  
3  
4 **Title: Salt content in cheese – a major contributor to salt intake in the UK**  
5  
6

7 Kawther M Hashem, Feng J He, Katharine Jenner, Graham A MacGregor  
8  
9

10 Wolfson Institute of Preventive Medicine, Barts and The London School of Medicine & Dentistry,  
11 Queen Mary University of London, UK  
12  
13

14  
15 **Running title:** Salt content of cheese in the UK  
16  
17  
18  
19

20 Correspondence to:

21 Kawther Hashem

22 Wolfson Institute of Preventive Medicine,

23 Barts and The London School of Medicine & Dentistry,

24 Queen Mary University of London,

25 Charterhouse Square,

26 London EC1M 6BQ.

27 Tel: 44 (0)20 7882 5941

28 Fax: 44 (0)20 7882 6270

29 E-mail: k.hashem@qmul.ac.uk  
30  
31  
32  
33  
34  
35  
36  
37  
38  
39  
40  
41  
42  
43  
44  
45  
46  
47  
48  
49  
50  
51  
52  
53  
54  
55  
56  
57  
58  
59  
60

## ABSTRACT

**Objectives:** To investigate the salt content of cheese sold in the UK supermarkets.

**Study design:** We carried out a cross-sectional survey in 2012, including 612 cheeses available in UK supermarkets.

**Methods:** The salt content (g/100g) was collected from product packaging and nutrient information panels of cheeses available in the top seven retailers.

**Results:** Salt content in cheese was high with a mean ( $\pm$ SD) of  $1.7\pm 0.58$  g/100g. There was a large variation in salt content between different types of cheeses and within the same type of cheese. On average, Halloumi ( $2.71\pm 0.34$ g/100g) and imported blue cheese ( $2.71\pm 0.83$ g/100g) contained the highest amounts of salt and Cottage cheese ( $0.55\pm 0.14$ g/100g) contained the lowest amount of salt. Overall, among the 394 cheeses that had salt reduction targets, 84.5% already met their respective Department of Health 2012 salt targets.

Cheddar and Cheddar style cheese is the most popular/biggest selling type of cheese in the UK and has the highest number of products in the analysis (N=250). On average, salt level was higher in branded compared with supermarket own brand Cheddar and Cheddar style products ( $1.78\pm 0.13$  vs  $1.72\pm 0.14$  g/100g,  $P<0.002$ ). 90% of supermarket own brand products met the 2012 target for Cheddar and Cheddar style cheese compared to 73% of branded products ( $P=0.001$ ).

**Conclusions:** Salt content of cheese in the UK is high. There is a wide variation in the salt content of cheeses and even within the same type of cheeses. Despite this, 84.5% of cheeses already met their respective 2012 targets. These findings demonstrate that much larger reductions in the amount of salt added to cheese could be made and more challenging targets need to be set, so that the UK can continue to lead the world in salt reduction.

Key words: cheese, reformulation, public health, food industry, salt

## ARTICLE SUMMARY

### Article focus:

- Populations around the world are consuming too much salt, largely as a result of the high salt content of processed foods.
- The UK is leading the world with salt reduction, having already achieved a reduction in average population salt intake of 15% from 9.5g to 8.1g from 2001 to 2011
- The UK food industry is working towards a set of voluntary salt reduction targets across more than 80 categories of food as part of the Government's Responsibility Deal
- Cheese is an important contributor of salt intake to the UK diet – this research was carried out to assess the salt content of cheeses sold in the UK supermarkets and compared them with the salt reduction targets

### Key messages:

- The salt content of cheese is high and there is a wide variation in salt content between different types of cheeses and within the same type of cheese.
- Among the 394 cheeses that had salt reduction targets, 84.5% already met their respective Department of Health 2012 salt targets.
- These findings demonstrate that much larger reductions in the amount of salt added to cheese could be made and much more challenging targets need to be set, so that the UK can continue to lead the world in salt reduction and save the maximum number of lives.

### Strengths and limitations of this study:

- This paper for the first time investigates the salt content of cheese products available in the UK supermarkets.
- This study was based on salt content data provided on cheese packaging labels in store; hence we relied on the accuracy of the data provided on the label. Therefore, it is assumed that the manufacturers provide accurate and up to date information in line with EU Regulations.

## INTRODUCTION

There is strong evidence that a high salt intake increases blood pressure and thereby increases the risk of cardiovascular disease (i.e. strokes, heart attacks and heart failure) and kidney disease.<sup>1 2</sup> A high salt intake also has other harmful effects on health, e.g. increasing the risk of stomach cancer<sup>3</sup> osteoporosis<sup>4</sup> and is indirectly linked to obesity<sup>5</sup>. Furthermore, it has been demonstrated that a reduction in population salt intake is one of the most cost-effective measures to improve public health.<sup>6</sup> Populations around the world are consuming salt in quantities that far exceed physiological requirements.<sup>7</sup> As such, the World Health Organisation (WHO) has recommended salt reduction as one of the top three priority actions to tackle the non-communicable disease crisis.<sup>8</sup> At the recent World Health Assembly, it was unanimously agreed that all countries should reduce their salt intake by 30% towards a target of 5g per day, by 2025.<sup>9</sup>

The UK has successfully developed a voluntary salt reduction programme which is considered one of “the most successful nutrition policies in the UK since the second world war”.<sup>10</sup> First developed by Consensus Action on Salt & Health (CASH), the strategy involves lowering salt intakes by a) reducing the salt levels of processed foods by a gradual reduction in the amount of salt added to the processed foods by 40% and b) reducing salt in cooking or at the table by 40%. In order to reduce average salt intake from the 9.5 g/d to the projected target of 6.0 g/d in adults, the Food Standards Agency (FSA) then set a series of progressively lower salt targets for over 80 categories of food,<sup>11 12</sup> which have now been incorporated as part of the Government’s Public Health Responsibility Salt Reduction Pledge as the ‘2012 targets’.<sup>13</sup> Other countries around the world, including Australia, United States and Canada, are adopting a similar target based approach to salt reduction<sup>7</sup>. To date, significant progress has been made by many food manufacturers and retailers in the UK, with salt content being reduced across the board, including by up to 50% in breakfast cereals, 45% in biscuits, 40% in pastry products, 25% in cakes and pasta sauces<sup>14</sup> and 20% in bread.<sup>15</sup> Furthermore, it has been reported that less salt is being added at the table by consumers.<sup>16</sup> The average salt intake in the UK population is steadily decreasing in parallel, with intakes at 8.1g/d,<sup>17</sup> the lowest known accurate figure of any developed country (i.e. measured by 24h urinary sodium excretion),<sup>7</sup> but continues to exceed the maximum recommended limit of 6 g/d. However, this represents a 15% reduction from 2001 (9.5g).<sup>18</sup> This reduction is estimated to be saving ≈9000 lives every year and resulting in major cost-savings to the UK economy of more than £1.5 billion per year.<sup>19</sup>

Approximately 75% of the salt consumed in the UK and other developed countries comes from processed foods, and is added by food manufacturers prior to consumer purchase.<sup>20</sup> A wide range of food products contain salt, including everyday foods such as bread, breakfast cereals, cheese and processed meat. Cheese is widely consumed. In the UK, cheese production for the 12 months ending

1  
2  
3 April 2013 was 376,350 tonnes,<sup>21</sup> with an average person consuming 9 kg of cheese per year.<sup>22</sup>  
4 Cheese is an important contributor of salt intake. In the UK, milk and milk products are estimated to  
5 contribute about 9% of salt intake, with cheeses accounting for 44% of the salt consumption in this  
6 category and the percentage has not decreased over the last 10 years.<sup>18 22</sup> Furthermore, in an analysis  
7 of 44,000 foods purchased by 21,000 households it was shown that more than one third of the salt  
8 purchased (37%) was accounted for by 5 food categories, one of which is cheese.<sup>23</sup> Also, cheese also  
9 contributes to salt intake in many other countries such as United States (3.8 - 11%),<sup>24 25</sup> Australia (4 -  
10 7%)<sup>26 27</sup>, New Zealand (2.8%)<sup>28</sup> and Canada (3.2 - 5.4%).<sup>29 30</sup>

11  
12  
13  
14  
15  
16 Cheese is heavily marketed for its high calcium content, particularly to children.<sup>31</sup> But as cheese is  
17 high in salt and salt intake is the main factor increasing calcium excretion in the urine, this claimed  
18 benefit requires more evidence to show the effect of cheese on the net calcium balance.<sup>32</sup> Cheese is  
19 also a major contributor to fat and saturated fat intake in the UK diet, 6% and 10% respectively.<sup>22</sup>

20  
21  
22  
23 Very little work has been conducted looking at the salt content of cheese in the UK. This research was  
24 carried out to evaluate the salt content listed on the labels of cheese products sold in the UK, report  
25 the variability in salt level and assess the salt levels in relation to the salt reduction targets.

## 26 27 28 29 30 **METHODS**

### 31 **Data Collection**

32  
33 The data was collected from product packaging and nutrient information panels. The survey was  
34 designed as a comprehensive survey of all cheeses available in a snapshot in time, using one large  
35 outlet per each of the 7 main retailers in the UK.

36  
37  
38  
39 For each cheese, the data collected included the company name, product name, pack weight, serving  
40 size, sodium/salt per 100 grams and sodium/salt per portion. When there were missing figures, they  
41 were calculated where possible, e.g. the missing sodium or salt values were converted by multiplying  
42 by 2.5 (sodium to salt) or dividing by 2.5 (salt to sodium). All data was double checked after entry,  
43 and a further 5% of entries were checked against the original source in a random selection of  
44 products.

45  
46  
47  
48  
49  
50 *Inclusion/exclusion criteria:* Data were collected from each of the major UK supermarkets (Asda,  
51 Sainsbury's, Tesco, Waitrose, Morrisons, The Co-operative and Marks and Spencer) to represent salt  
52 levels of cheese in the UK. Data were collected for supermarket own brand and branded cheese  
53 products available. However, due to resource restrictions only the data for cheddar and cheddar style  
54 cheese products were collected from Morrisons. Packaged cheese products with salt or sodium  
55  
56

1  
2  
3 information labeled were included. Cheese products with other food components such as  
4 biscuits/crackers or ham were excluded, with the exception of Cottage cheese, cream cheese and  
5 Wensleydale traditionally produced with fruits or vegetables. Also, cheese products that contained  
6 two different types of cheese were excluded such as a product of grated mozzarella and Cheddar  
7 cheese and a Torta con Gorgonzola which is blend of Mascarpone and layered Gorgonzola cheese.  
8  
9 When two sizes were available, the standard weight was used. Cheese types with a sample size less  
10 than 8 products with nutrient information on the packaging, found across the different supermarkets,  
11 were excluded; Jarlsberg (4 products), Mascarpone (5), Lancashire (2), Leerdammer (4), Maasdam  
12 (2), sheep, Appenzeller (1), Bavarian Smoked (1) and Ricotta (2).  
13  
14  
15  
16

17  
18 *Product categories:* Products were categorised into the following types of cheese: Brie, Camembert,  
19 Cheddar and Cheddar style, Cheshire, Cottage cheese (plain and with pineapple, chilli, pepper, onion  
20 and chives), Cream cheese (plain and with garlic, herbs, chilli, onion and chives), Double Gloucester,  
21 Edam, Emmental, Feta, Goat's cheese, Blue cheese (produced in the UK), other blue cheese (not  
22 produced in the UK), Gouda, Gruyere, Halloumi, Mozzarella, Parmesan (Grana Padano, Parmigiano  
23 Reggiano and Perorino Romano), Red Leicester, Wensleydale (plain and with fruits), Spread and  
24 other processed cheese (included singles and string cheeses). This was partially based on the criteria  
25 set by the UK Department of Health for the cheese salt reduction targets. The data was also  
26 categorised separately into supermarket own brand and branded and hard pressed with and without  
27 salt reduction targets and blue cheese with and without salt targets. The hard pressed cheese category  
28 included the following cheese types; Emmental, Wensleydale, Cheshire, hard Mozzarella  
29 Gruyere, Red Leicester, Double Gloucester, Cheddar /Cheddar style, Parmesan, Gouda, Edam and  
30 Halloumi. The blue cheese category included blue cheese produced in the UK and imported into the  
31 UK.  
32  
33  
34  
35  
36  
37  
38  
39  
40

## 41 **Statistical analysis**

### 42 *Comparison among products:*

43  
44 Independent Samples T Test was used to compare the levels of salt between supermarket own brand  
45 and branded products, and hard pressed with and without salt reduction targets and blue cheese with  
46 and without salt targets and cheddar cheese with and without salt targets.  
47  
48  
49  
50

51  
52 Data are reported as mean, SD, range as indicated. Significance in all tests carried out was deemed  
53 significant as being  $p < 0.05$ . All data were analysed using SPSS .  
54  
55  
56  
57  
58  
59  
60

1  
2  
3 *Salt targets:* For each cheese type, we calculated the total number and percentage of products that met  
4 the Department of Health's 2012 salt target for cheese. We used Chi-square test to compare the  
5 proportion of supermarket own brand and branded products for Cheddar and Cheddar style cheese  
6 that met the Department of Health's 2012 salt targets.  
7  
8  
9

## 10 **RESULTS**

11  
12  
13 A total of 612 cheese products met the inclusion criteria.  
14  
15

### 16 **Within each type of cheese analysis**

17  
18  
19 Figure 1 shows the salt level in different types of cheeses per 100g. Salt content in cheese was high  
20 and there was a large variation in salt content between different types of cheeses and within the same  
21 type of cheese. On average, eight out of 23 types of cheese contain more than 2g of salt per 100g;  
22 Halloumi ( $2.71 \pm 0.34\text{g}/100\text{g}$ ) and imported blue cheese ( $2.71 \pm 0.83\text{g}/100\text{g}$ ) contained the highest  
23 amounts of salt. Whereas, only three types of cheeses contained less than 1g of salt per 100g; Cottage  
24 cheese (0.55g) contained the lowest amount of salt.  
25  
26  
27  
28  
29

30  
31 Table 1 compares the salt levels for each type of cheese between supermarket and branded products.  
32 10 out of the 23 types of cheeses had a large enough sample size to analyse further, of these, seven  
33 showed a higher salt level in branded than supermarket own brand products and three showed that  
34 supermarket own products had a higher salt level.  
35  
36  
37

38  
39 Cheddar and Cheddar style cheese is the major type of cheese in the UK and has the highest number  
40 of products in our analysis. The salt level in branded Cheddar and Cheddar style was 3.5% higher than  
41 supermarket own brand ( $p < 0.001$ ) (figure 2).  
42  
43

### 44 **Comparing with the 2012 targets**

45  
46 We compared the salt levels in our survey with the 2012 cheese targets, as part of the Department of  
47 Health's Responsibility Deal. Among 23 types of cheese, 10 types had salt targets and 13 did not have  
48 targets. Overall, cheeses with targets had significantly lower levels of salt compared to those without  
49 targets (Table 2). Hard pressed cheese and blue cheeses with targets also had significantly lower  
50 levels of salt compared to those without targets (Table 2).  
51  
52  
53

54  
55 Table 3 shows the cheese products meeting the Department of Health 2012 salt targets. Within each  
56 cheese category, the average salt level was lower in products that met the targets compared to  
57  
58  
59  
60



1  
2  
3 products that did not meet the target. Overall, among the 394 cheeses that had salt reduction targets,  
4 84.5% already met their respective 2012 targets. There are three cheese types where all of the  
5 products surveyed have met the 2012 targets (Table 3) and a larger proportion of cheese types are  
6 close to meeting the 2012 targets. However, only Double Gloucester (60%) and other processed  
7 cheeses, includes singles and strings (54.5%) had the lowest proportion of products meeting the  
8 targets.  
9  
10  
11

12  
13 Table 4 compares the supermarket and branded products that met the 2012 targets. A greater number  
14 of supermarket own brand products (90%) compared to branded products (73%) met the target for  
15 Cheddar and Cheddar style cheese (Figure 2).  
16  
17  
18

## 19 **DISCUSSION**

20  
21 Salt content in cheeses was found to be high and there was a large variation in salt content between  
22 different types of cheeses and within the same type of cheese. In most types of cheese, branded cheese  
23 had a higher salt level compared with supermarket own. Overall, among the 394 cheeses that had salt  
24 reduction targets, 84.5% already met their respective 2012 targets. Furthermore, 90% of supermarket  
25 own brand products met the target for Cheddar and Cheddar style cheese compared to 73% of branded  
26 products.  
27  
28  
29

30  
31  
32 Our finding of a high salt content in cheeses sold in the UK is similar to those observed in the USA,<sup>33</sup>  
33 <sup>34</sup> Australia,<sup>35</sup> France,<sup>36</sup> Belgium,<sup>37</sup> Canada,<sup>38</sup> New Zealand,<sup>39</sup> South Africa<sup>40</sup> and Brazil<sup>41</sup> showing  
34 that high levels of salt in cheese is a global challenge in countries of all levels of development. Clearly  
35 the high level of salt in cheese is a global challenge in countries of all levels of development.  
36  
37  
38

39  
40 Salt has been claimed to be important in the flavour, texture, structure, acceptability, shelf-life and  
41 safety of cheese.<sup>42-44</sup> But the development of cheese with lower salt content has been thriving.<sup>45-51</sup>  
42 Studies describing the reduction of salt in Cheddar cheese are limited, despite the dominance  
43 importance of this cheese in the British diet. Those studies that exist involve reducing salt in cheddar  
44 cheese<sup>52</sup> or the addition of other compounds that can function in ways similar to salt (sodium  
45 chloride), such as potassium chloride,<sup>45 53-57</sup> magnesium chloride and calcium chloride.<sup>58 59</sup>  
46  
47 Supermarket own brand cheese have been produced with lower levels of salt, which demonstrates that  
48 – despite claims to the contrary - delivering salt reduction appears not to be a technical issue related to  
49 cheese manufacture. Corporate decisions about food composition are often based upon factors such as  
50 common practice, taste and price, rather than health. However, evidence suggests that where salt  
51 reductions are made gradually in products, no reduction in consumer preference is reported.<sup>60 61</sup>  
52  
53  
54  
55  
56  
57  
58  
59  
60

Our paper, using the example of one of the top 10 contributors of salt to the UK diet – cheese, demonstrates that a national target based approach to reformulation can be a successful method for reducing the salt content in food. Our findings show that the cheese types with salt targets contained less salt than cheese types without salt targets, suggest that the targets have helped focus and drive the manufacturer to reduce their salt levels. There were three cheese types where all of the products surveyed have met the 2012 targets (Table 3) and a larger proportion of cheese types are close to meeting the 2012 targets. This clearly shows that the targets need to be reset to much lower levels as they are currently not sufficiently challenging. However, not all cheese types sold in the UK (Appendix 1) have a salt target, unlike in other countries such as the New York City salt reduction targets, where they have included a target for parmesan type of cheese.<sup>62</sup> Also, some of UK cheese salt targets are less ambitious when compared to New York City salt reduction targets, particularly the main target in this food category, which is for hard pressed cheeses such as Cheddar cheese. In the UK the target is 1.8g/100g but in New York it is 1.58g/100g for 2012 and 1.5g/100g for 2014. Furthermore, the sales weighted mean (1.67g) is lower than the average found in our study and lower than the UK 2012 salt target. There is a bigger variation in the cheese types without targets (18-500%); setting an average target (suggest 30% reduction on the highest available products) would narrow this variability.

### **LIMITATIONS**

Our study was based on salt content data provided on cheese packaging labels in store; hence we relied on the accuracy of the data provided on the label. Therefore, it is assumed that the manufacturers provide accurate and up to date information in line with EU Regulations. However, further study should include salt content determined through laboratory analysis to achieve a better understanding of the true salt content. When collecting data we did not capture ingredients list, this means we are unable to ascertain if salt has been replaced with any other ingredients/additives in the cheese that came out lowest. Such data should be collected in future surveys. Nevertheless, the results of this study are relevant and serve to document the salt content of cheese products sold in UK supermarkets, providing a foundation for future studies and providing information for programs and the dairy industry to potentially move toward the reformulation of these products.

### **CONCLUSION**

This research demonstrates that salt content of cheese in the UK is high and there is a wide variation in the salt content of cheeses and even within the same type of cheeses. Despite this, 84.5% of cheeses already met their respective 2012 targets. These findings demonstrate that much larger reductions in the amount of salt added to cheese could be made and much more challenging targets need to be set.

1  
2  
3  
4 Other countries around the world now need to follow suit and set up a target based approach to  
5 reducing salt content of processed foods. While the food category emphasis may differ between  
6 countries, the concept of using salt targets to achieve a 'level playing field' amongst the industry is  
7 universal. A product like cheese is widely consumed internationally and this research demonstrates  
8 the variability in salt levels within each type and how targets can help to lower the levels of salt.  
9  
10  
11  
12  
13  
14

15 **Legend for figure 1: salt levels (g/100g) in each type of cheese**

16 **Legend for figure 2: salt levels in supermarket and branded Cheddar and Cheddar-style cheese**  
17  
18  
19  
20  
21  
22  
23  
24  
25  
26  
27  
28  
29  
30  
31  
32  
33  
34  
35  
36  
37  
38  
39  
40  
41  
42  
43  
44  
45  
46  
47  
48  
49  
50  
51  
52  
53  
54  
55  
56  
57  
58  
59  
60

**Table 1 Salt levels for each type of cheese between supermarket and branded products.**

| Cheese type                   | Supermarket |           | Branded |           |
|-------------------------------|-------------|-----------|---------|-----------|
|                               | N           | Mean±SD   | N       | Mean±SD   |
| <b>Camembert</b>              | 12          | 1.63±0.16 | 4       | 1.49±0.01 |
| <b>Cheddar /Cheddar style</b> | 187         | 1.72±0.14 | 63      | 1.78±0.13 |
| <b>Other processed</b>        | 14          | 2.48±0.38 | 8       | 2.01±0.44 |
| <b>Cheese Spread</b>          | 7           | 1.89±0.28 | 12      | 1.88±0.31 |
| <b>Cream cheese</b>           | 14          | 0.68±0.24 | 5       | 0.86±0.13 |
| <b>Edam</b>                   | 12          | 2.38±0.28 | 4       | 2.01±0.28 |
| <b>Emmental</b>               | 5           | 0.60±0.14 | 4       | 1.66±0.28 |
| <b>Feta</b>                   | 18          | 2.51±0.58 | 4       | 2.52±0.71 |
| <b>Goat's cheese</b>          | 16          | 1.23±0.40 | 4       | 1.24±0.58 |
| <b>Mozzarella</b>             | 18          | 0.65±0.33 | 4       | 1.16±0.35 |

**Table 2 Salt levels in cheese with and without salt targets (g salt/100g)**

| Cheese type         | With target |           | Without target |           | p value |
|---------------------|-------------|-----------|----------------|-----------|---------|
|                     | N           | Mean±SD   | N              | Mean±SD   |         |
| <b>All</b>          | 394         | 1.66±0.42 | 218            | 1.78±0.79 | 0.04    |
| <b>Hard pressed</b> | 303         | 1.70±0.20 | 99             | 1.96±0.72 | 0.00    |
| <b>Blue cheese*</b> | 15          | 2.02±0.09 | 13             | 2.71±0.83 | 0.01    |

\* The blue cheese category here included blue cheese produced in the UK and imported into the UK.

Table 3 cheese products meeting the Department of Health 2012 salt targets (g salt/100g)

| Cheese type                   | 2012 salt target<br>(g/100g) | Number<br>of<br>products | Meeting target |         |           |
|-------------------------------|------------------------------|--------------------------|----------------|---------|-----------|
|                               |                              |                          | N              | percent | Mean±SD   |
| <b>Cheddar /Cheddar style</b> | 1.8                          | 250                      | 214            | 85.6    | 1.71±0.12 |
| <b>Other processed</b>        | 2                            | 22                       | 12             | 54.5    | 1.93±0.17 |
| <b>Cheese Spread</b>          | 2.25                         | 19                       | 19             | 100     | 1.88±0.29 |
| <b>Cheshire</b>               | 1.8                          | 8                        | 8              | 100     | 1.43 n/a  |
| <b>Cottage cheese</b>         | 0.63                         | 16                       | 14             | 87.5    | 0.51±0.03 |
| <b>Cream cheese</b>           | 0.75                         | 19                       | 14             | 73.7    | 0.61±0.07 |
| <b>Double Gloucester</b>      | 1.8                          | 10                       | 6              | 60.0    | 1.58±0.14 |
| <b>Red Leicester</b>          | 1.80                         | 21                       | 18             | 85.7    | 1.69±0.11 |
| <b>Blue cheese</b>            | 2.10                         | 15                       | 14             | 93.3    | 2.00±0.02 |
| <b>Wensleydale</b>            | 1.80                         | 14                       | 14             | 100     | 1.13 n/a  |
| <b>Overall</b>                | n/a                          | 394                      | 333            | 84.5%   | 1.61±0.38 |

**Table 4 Salt levels in supermarket and branded products that meet the 2012 targets**

| Cheese type                   | 2012 salt target |     | Meeting target  |    |             |
|-------------------------------|------------------|-----|-----------------|----|-------------|
|                               | (g/100g)         | N   | Supermarket (%) | N  | Branded (%) |
| <b>Cheddar /Cheddar style</b> | 1.8              | 168 | 90              | 46 | 73          |
| <b>Other processed</b>        | 2.0              | 5   | 36              | 7  | 88          |
| <b>Cheese Spread</b>          | 2.25             | 7   | 100             | 12 | 100         |
| <b>Cheshire</b>               | 1.8              | 8   | 100             | 0  | n/a         |
| <b>Cottage cheese</b>         | 0.63             | 14  | 93              | 0  | n/a         |
| <b>Cream cheese</b>           | 0.75             | 12  | 86              | 2  | 40          |
| <b>Double Gloucester</b>      | 1.8              | 6   | 100             | 0  | n/a         |
| <b>Red Leicester</b>          | 1.8              | 17  | 85              | 1  | 100         |
| <b>Blue cheese</b>            | 2.1              | 12  | 92              | 2  | 100         |
| <b>Wensleydale</b>            | 1.8              | 13  | 100             | 1  | 100         |

**AUTHOR CONTRIBUTIONS**

GM and KJ conceived the idea and designed research; KH conducted research; KH and FH analysed data; KH wrote the first draft of the manuscript and all authors contributed to the interpretation of the results and revision of the manuscript, and approved the final manuscript. GM had primary responsibility for final content.

Funding: None

**FUNDING STATEMENT**

This research received no specific grant from any funding agency in the public, commercial or not-for-profit sectors

**COMPETING INTERESTS**

All authors have completed the ICMJE uniform disclosure form at [www.icmje.org/coi\\_disclosure.pdf](http://www.icmje.org/coi_disclosure.pdf) (available on request from the corresponding author) and declare: no support from any organisation for the submitted work; no financial relationships with any organisations that might have an interest in the submitted work in the previous three years. KH and KJ are employees of Consensus Action on Salt & Health (CASH), a nonprofit charitable organisation. FH is a member of CASH and its international branch World Action on Salt & Health (WASH) and does not receive any financial support from CASH or WASH. MacGregor GA is Chairman of Blood Pressure UK (BPUK), Chairman of CASH and Chairman of WASH. BPUK, CASH and WASH are nonprofit charitable organisations. GM does not receive any financial support from any of these organisations.

**DATA SHARING STATEMENT**

Extra data is available by emailing Kawther Hashem on [k.hashem@qmul.ac.uk](mailto:k.hashem@qmul.ac.uk).



## REFERENCE

1. He FJ, MacGregor GA. Reducing population salt intake worldwide: from evidence to implementation. *Progress in cardiovascular diseases* 2010;52:363-82.
2. He FJ, MacGregor GA. Salt reduction lowers cardiovascular risk: meta-analysis of outcome trials. *Lancet* 2011;378:380-2.
3. D'Elia L, Rossi G, Ippolito R, Cappuccio FP, Strazzullo P. Habitual salt intake and risk of gastric cancer: a meta-analysis of prospective studies. *Clinical nutrition* 2012;31:489-98.
4. Devine A, Criddle RA, Dick IM, Kerr DA, Prince RL. A longitudinal study of the effect of sodium and calcium intakes on regional bone density in postmenopausal women. *The American journal of clinical nutrition* 1995;62:740-5.
5. He FJ, Marrero NM, MacGregor GA. Salt intake is related to soft drink consumption in children and adolescents: A link to obesity? Response. *Hypertension* 2008;51:E55-E55.
6. Asaria P, Chisholm D, Mathers C, Ezzati M, Beaglehole R. Chronic disease prevention: health effects and financial costs of strategies to reduce salt intake and control tobacco use. *Lancet* 2007;370:2044-53.
7. Webster JL, Dunford EK, Hawkes C, Neal BC. Salt reduction initiatives around the world. *Journal of hypertension* 2011;29:1043-50.
8. Beaglehole R, Bonita R, Horton R, Adams C, Alleyne G, Asaria P, et al. Priority actions for the non-communicable disease crisis. *Lancet* 2011;377:1438-47.
9. SIXTY-SIXTH WORLD HEALTH ASSEMBLY. Follow-up to the Political Declaration of the High-level Meeting of the General Assembly on the Prevention and Control of Non-communicable Diseases. . [http://apps.who.int/gb/ebwha/pdf\\_files/WHA66/A66\\_R10-en.pdf](http://apps.who.int/gb/ebwha/pdf_files/WHA66/A66_R10-en.pdf) (accessed 26 September 2013).
10. Winkler JT. Obesity expose offers slim pickings. *Bmj* 2012;345:e4465-e65.
11. Salt reduction targets: March 2006. London, UK: Food Standards Agency. 2006. <http://www.food.gov.uk/multimedia/pdfs/saltpap06.pdf> (accessed 29 July 2013).
12. Food Standards Agency. Agency Publishes 2012 salt reduction targets, 8 May 2009. [www.food.gov.uk/news/newsarchive/2009/may/saltpap09](http://www.food.gov.uk/news/newsarchive/2009/may/saltpap09) (accessed 29 July 2013).
13. Department of Health Responsibility Deal, 27 July 2012. <https://responsibilitydeal.dh.gov.uk/pledges/pledge/?pl=9> (accessed 29 July 2013).
14. Wyness LA, Buttriss JL, Stanner SA. Reducing the population's sodium intake: the UK Food Standards Agency's salt reduction programme. *Public health nutrition* 2012;15:254-61.
15. Brinsden HC, He FJ, Jenner KH, Macgregor GA. Surveys of the salt content in UK bread: progress made and further reductions possible. *BMJ open* 2013;3.
16. Asaria P, Chisholm D, Mathers C, Ezzati M, Beaglehole R. Chronic disease prevention: health effects and financial costs of strategies to reduce salt intake and control tobacco use (vol 370, pg 2044, 2007). *Lancet* 2007;370:2004-04.
17. Department of Health: Assessment of Dietary Sodium Levels Among Adults (aged 19-64) in England, 2011 <http://transparency.dh.gov.uk/2012/06/21/sodium-levels-among-adults/> (accessed 29 July 2013).
18. Henderson L IK, Gregory J, Bates CJ, Prentice A, Perks J, et al. *National Diet & Nutrition Survey: Adults aged 19 to 64*: London: TSO, 2003.
19. National Institute for Health and Clinical Excellence (NICE). Guidance on the prevention of cardiovascular disease at the population level. . <http://guidance.nice.org.uk/PH25> (accessed 26 September 2013).
20. James WP, Ralph A, Sanchez-Castillo CP. The dominance of salt in manufactured food in the sodium intake of affluent societies. *Lancet* 1987;1:426-9.
21. DairyCo. <http://www.dairyco.org.uk/market-information/processing-trade/dairy-product-production/uk-dairy-product-production/>.

- 1  
2  
3 22. National Diet and Nutrition Survey: Headline results from Years 1 and 2 (combined) of the rolling  
4 programme 2008/9 - 2009/10.  
5 [https://www.gov.uk/government/uploads/system/uploads/attachment\\_data/file/216485/d](https://www.gov.uk/government/uploads/system/uploads/attachment_data/file/216485/d_h_128556.pdf)  
6 [h\\_128556.pdf](https://www.gov.uk/government/uploads/system/uploads/attachment_data/file/216485/d_h_128556.pdf) (accessed 11 November 2013).
- 7 23. Ni Mhurchu C, Capelin C, Dunford EK, Webster JL, Neal BC, Jebb SA. Sodium content of processed  
8 foods in the United Kingdom: analysis of 44,000 foods purchased by 21,000 households. *The*  
9 *American journal of clinical nutrition* 2011;93:594-600.
- 10 24. Sodium Intake Among Adults --- United States, 2005-2006.  
11 [http://www.cdc.gov/mmwr/preview/mmwrhtml/mm5924a4.htm?s\\_cid=mm5924a4\\_e%0D](http://www.cdc.gov/mmwr/preview/mmwrhtml/mm5924a4.htm?s_cid=mm5924a4_e%0D%0A)  
12 [%0A](http://www.cdc.gov/mmwr/preview/mmwrhtml/mm5924a4.htm?s_cid=mm5924a4_e%0D%0A).
- 13 25. CDC. Centers for disease control and prevention: vital signs: food categories contributing the  
14 most to sodium consumption— United States, 2007–2008. *MMWR Morb Mortal Wkly Rep*  
15 2012;61:92–8.
- 16 26. Grimes CA, Campbell KJ, Riddell LJ, Nowson CA. Sources of sodium in Australian children's diets  
17 and the effect of the application of sodium targets to food products to reduce sodium  
18 intake. *The British journal of nutrition* 2011;105:468-77.
- 19 27. Charlton K, Yeatman H, Houweling F, Guenon S. Urinary sodium excretion, dietary sources of  
20 sodium intake and knowledge and practices around salt use in a group of healthy Australian  
21 women. *Australian and New Zealand journal of public health* 2010;34:356-63.
- 22 28. Ministry of Health and the University of Auckland. Nutrition and the burden of disease: New  
23 Zealand 1997–2011. Wellington: Ministry of Health, 2003. .  
24 <http://www.moh.govt.nz/notebook/nbbooks.nsf/0/A8D85BC5BAD17610CC256D970072A0A>  
25 [A/\\$file/](http://www.moh.govt.nz/notebook/nbbooks.nsf/0/A8D85BC5BAD17610CC256D970072A0A).
- 26 29. Garriguet D. Sodium consumption at all ages [http://www.statcan.gc.ca/pub/82-003-](http://www.statcan.gc.ca/pub/82-003-x/2006004/article/sodium/4148995-eng.htm)  
27 [x/2006004/article/sodium/4148995-eng.htm](http://www.statcan.gc.ca/pub/82-003-x/2006004/article/sodium/4148995-eng.htm).
- 28 30. Fischer PWF, Vigneault M, Huang R, Arvaniti K, Roach P. Sodium food sources in the Canadian  
29 diet. *Appl Physiol Nutr Me* 2009;34:884-92.
- 30 31. Aktas Arnas Y. The effects of television food advertisement on children's food purchasing  
31 requests. *Pediatrics international : official journal of the Japan Pediatric Society*  
32 2006;48:138-45.
- 33 32. Cappuccio FP, Markandu ND, Beynon GW, Shore AC, MacGregor GA. Effect of increasing calcium  
34 intake on urinary sodium excretion in normotensive subjects. *Clinical science* 1986;71:453-6.
- 35 33. Agarwal S, McCoy D, Graves W, Gerard PD, Clark S. Sodium content in retail Cheddar, Mozzarella,  
36 and process cheeses varies considerably in the United States. *Journal of dairy science*  
37 2011;94:1605-15.
- 38 34. Moshfegh AJ, Holden, J. M., Cogswell, M. E., Kuklina, E. V., Patel, S. M., Gunn, J. P., Gillespie C,  
39 Hong, Y., Merritt, R., & Galuska, D. A. Vital signs: food categories contributing the most to  
40 sodium consumption - United States, 2007-2008. *MMWR Morbidity and mortality weekly*  
41 *report* 2012;61:92-8.
- 42 35. Grimes CA, Nowson CA, Lawrence M. An evaluation of the reported sodium content of Australian  
43 food products. *Int J Food Sci Tech* 2008;43:2219-29.
- 44 36. Chekri R, Noel L, Millour S, Vastel C, Kadar A, Sirot V, et al. Calcium, magnesium, sodium and  
45 potassium levels in foodstuffs from the second French Total Diet Study. *J Food Compos Anal*  
46 2012;25:97-107.
- 47 37. Huybrechts I, De Keyzer W, Lin Y, Vandevijvere S, Vereecken C, Van Oyen H, et al. Food sources  
48 and correlates of sodium and potassium intakes in Flemish pre-school children. *Public health*  
49 *nutrition* 2012;15:1039-46.
- 50 38. Tanase CM, Griffin P, Koski KG, Cooper MJ, Cockell KA. Sodium and potassium in composite food  
51 samples from the Canadian Total Diet Study. *J Food Compos Anal* 2011;24:237-43.
- 52  
53  
54  
55  
56  
57  
58  
59  
60

- 1  
2  
3 39. Thomson BM, Vannoort RW, Haslemore RM. Dietary exposure and trends of exposure to  
4 nutrient elements iodine, iron, selenium and sodium from the 2003-4 New Zealand Total  
5 Diet Survey. *The British journal of nutrition* 2008;99:614-25.
- 6 40. Charlton KE, Steyn K, Levitt NS, Zulu JV, Jonathan D, Veldman FJ, et al. Diet and blood pressure in  
7 South Africa: Intake of foods containing sodium, potassium, calcium, and magnesium in  
8 three ethnic groups. *Nutrition* 2005;21:39-50.
- 9 41. Felicio TL, Esmerino EA, Cruz AG, Nogueira LC, Raices RSL, Deliza R, et al. Cheese. What is its  
10 contribution to the sodium intake of Brazilians? *Appetite* 2013;66:84-88.
- 11 42. Pastorino AJ, Hansen CL, McMahon DJ. Effect of salt on structure-function relationships of  
12 cheese. *Journal of dairy science* 2003;86:60-9.
- 13 43. Ilhak OI, Oksuztepe G, Calicioglu M, Patir B. Effect of Acid Adaptation and Different Salt  
14 Concentrations on Survival of *Listeria Monocytogenes* in Turkish White Cheese. *J Food*  
15 *Quality* 2011;34:379-85.
- 16 44. Shrestha S, Grieder JA, McMahon DJ, Nummer BA. Survival of *Salmonella* Serovars Introduced as  
17 a Post-Aging Contaminant during Storage of Low-Salt Cheddar Cheese at 4, 10, and 21  
18 degrees C. *Journal of food science* 2011;76:M616-M21.
- 19 45. Grummer J, Bobowski N, Karalus M, Vickers Z, Schoenfuss T. Use of potassium chloride and flavor  
20 enhancers in low sodium Cheddar cheese. *Journal of dairy science* 2013;96:1401-18.
- 21 46. Ayyash MM, Sherkat F, Shah NP. Effect of partial NaCl substitution with KCl on the texture  
22 profile, microstructure, and sensory properties of low-moisture mozzarella cheese. *J Dairy*  
23 *Res* 2013;80:7-13.
- 24 47. Karimi R, Mortazavian AM, Karami M. Incorporation of *Lactobacillus casei* in Iranian ultrafiltered  
25 Feta cheese made by partial replacement of NaCl with KCl. *Journal of dairy science*  
26 2012;95:4209-22.
- 27 48. Ayyash MM, Shah NP. The effect of substitution of NaCl with KCl on chemical composition and  
28 functional properties of low-moisture Mozzarella cheese. *Journal of dairy science*  
29 2011;94:3761-68.
- 30 49. Ayyash MM, Shah NP. Effect of Partial Substitution of NaCl with KCl on Proteolysis of Halloumi  
31 Cheese. *Journal of food science* 2011;76:C31-C37.
- 32 50. Gomes AP, Cruz AG, Cadena RS, Celeghini RMS, Faria JAF, Bolini HMA, et al. Manufacture of low-  
33 sodium Minas fresh cheese: Effect of the partial replacement of sodium chloride with  
34 potassium chloride. *Journal of dairy science* 2011;94:2701-06.
- 35 51. Van Dender AGF, Spadoti LM, Zacarchenco PB, Trento FKHS, Alves ATS, Mendes TQ, et al.  
36 Optimisation of the manufacturing of processed cheese without added fat and reduced  
37 sodium. *Aust J Dairy Technol* 2010;65:217-21.
- 38 52. Rulikowska A, Kilcawley KN, Doolan IA, Alonso-Gomez M, Nongonierma AB, Hannon JA, et al. The  
39 impact of reduced sodium chloride content on Cheddar cheese quality. *Int Dairy J*  
40 2013;28:45-55.
- 41 53. Hystead E, Diez-Gonzalez F, Schoenfuss TC. The effect of sodium reduction with and without  
42 potassium chloride on the survival of *Listeria monocytogenes* in Cheddar cheese. *Journal of*  
43 *dairy science* 2013.
- 44 54. Lu Y. "Effects of sodium chloride salting and substitution with potassium chloride on whey  
45 expulsion of cheese" All Graduate Theses and Dissertations. Paper 1285. 2012.  
46 <http://digitalcommons.usu.edu/etd/1285>.
- 47 55. Lindsay RC, Hargett SM, Bush CS. Effect of Sodium-Potassium (1 - 1) Chloride and Low Sodium-  
48 Chloride Concentrations on Quality of Cheddar Cheese. *Journal of dairy science*  
49 1982;65:360-70.
- 50 56. Reddy KA, Marth EH. Microflora of Cheddar Cheese Made with Sodium-Chloride, Potassium-  
51 Chloride, or Mixtures of Sodium and Potassium-Chloride. *Journal of food protection*  
52 1995;58:54-61.
- 53  
54  
55  
56  
57  
58  
59  
60

- 1  
2  
3 57. Reddy KA, Marth EH. Lactic-Acid Bacteria in Cheddar-Cheese Made with Sodium-Chloride,  
4 Potassium-Chloride or Mixtures of the 2 Salts. Journal of food protection 1995;58:62-69.  
5 58. Grummer J, Karalus M, Zhang K, Vickers Z, Schoenfuss TC. Manufacture of reduced-sodium  
6 Cheddar-style cheese with mineral salt replacers. Journal of dairy science 2012;95:2830-39.  
7 59. Fitzgerald E, Buckley J. Effect of Total and Partial Substitution of Sodium-Chloride on the Quality  
8 of Cheddar Cheese. Journal of dairy science 1985;68:3127-34.  
9 60. Girgis S, Neal B, Prescott J, Prendergast J, Dumbrell S, Turner C, et al. A one-quarter reduction in  
10 the salt content of bread can be made without detection. Eur J Clin Nutr 2003;57:616-20.  
11 61. Liem DG, Miremadi F, Keast RS. Reducing sodium in foods: the effect on flavor. Nutrients  
12 2011;3:694-711.  
13 62. National Salt Reduction Initiative packed food categories and targets  
14 <http://www.nyc.gov/html/doh/downloads/pdf/cardio/packaged-food-targets.pdf> (accessed  
15 28th August 2013).  
16  
17  
18  
19  
20  
21  
22  
23  
24  
25  
26  
27  
28  
29  
30  
31  
32  
33  
34  
35  
36  
37  
38  
39  
40  
41  
42  
43  
44  
45  
46  
47  
48  
49  
50  
51  
52  
53  
54  
55  
56  
57  
58  
59  
60

## APPENDIX 1

| Cheese type                                                                                                                                                                                                                                                                                         | Salt/100g                          |
|-----------------------------------------------------------------------------------------------------------------------------------------------------------------------------------------------------------------------------------------------------------------------------------------------------|------------------------------------|
| <b>Cheddar and other similar "hard pressed" cheeses</b><br>e.g. Cheshire, Lancashire, Wensleydale, Caerphilly, Double Gloucester, Leicester, Derby etc, including mild, medium or mature and those products where levels of fat have been reduced                                                   | 1.8 (average r)                    |
| <b>"Fresh" cheeses</b><br>Excludes fromage frais as no salt is added to this product. Also excludes Brie, Camembert and other similar soft rinded cheeses.<br>4.2.1 Soft white cheese e.g. Philadelphia - Includes all soft white cheese, flavoured or unflavoured, including reduced fat products. | 0.55 (average r)<br>0.75 (maximum) |
| <b>Cottage cheese, plain Includes all unflavoured cottage cheese.</b><br>Excludes flavoured products<br>Cottage cheese, flavoured Includes all flavoured cottage cheese (onion and chive, pineapple)                                                                                                | 0.55 (average r)<br>0.63 (maximum) |
| <b>Mozzarella (used in food products)</b><br>Includes mozzarella products for food industry use only. Excludes fresh mozzarella sold in retail outlets.                                                                                                                                             | 1.5 (average p)                    |
| <b>Blue cheese</b><br>UK produced blue cheeses only                                                                                                                                                                                                                                                 | 2.1 (average p)                    |
| <b>Processed Cheese</b>                                                                                                                                                                                                                                                                             | 1.63 (average r)                   |
| <b>Cheese spreads</b>                                                                                                                                                                                                                                                                               | 2.25 (maximum)                     |
| <b>Other processed cheese (e.g. slices, strings, etc.)</b>                                                                                                                                                                                                                                          | 2.0 (average r)                    |

1  
2  
3  
4  
5  
6  
7  
8  
9  
10  
11  
12  
13  
14  
15  
16  
17  
18  
19  
20  
21  
22  
23  
24  
25  
26  
27  
28  
29  
30  
31  
32  
33  
34  
35  
36  
37  
38  
39  
40  
41  
42  
43  
44  
45  
46  
47  
48  
49  
50  
51  
52  
53  
54  
55  
56  
57  
58  
59  
60

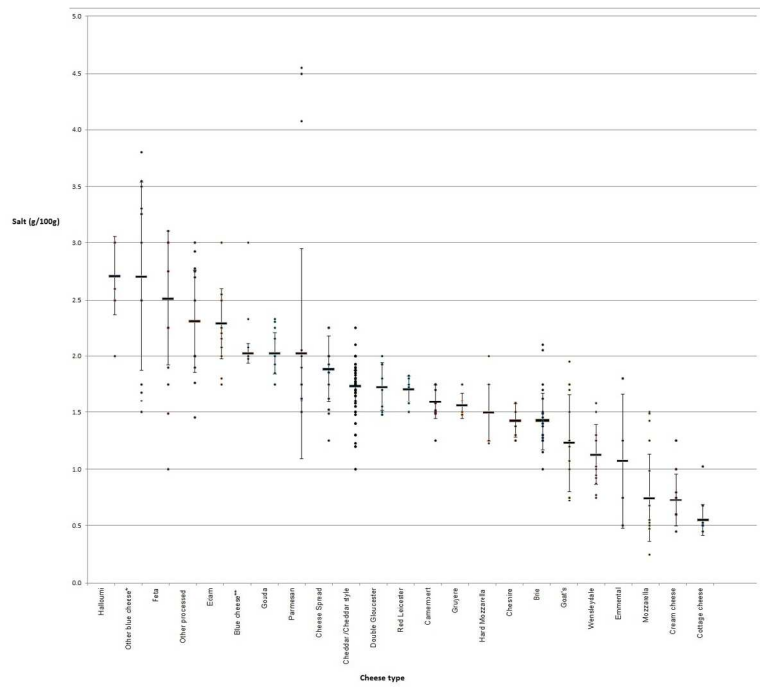

Figure 1 salt levels in each type of cheese  
486x335mm (96 x 96 DPI)

view only

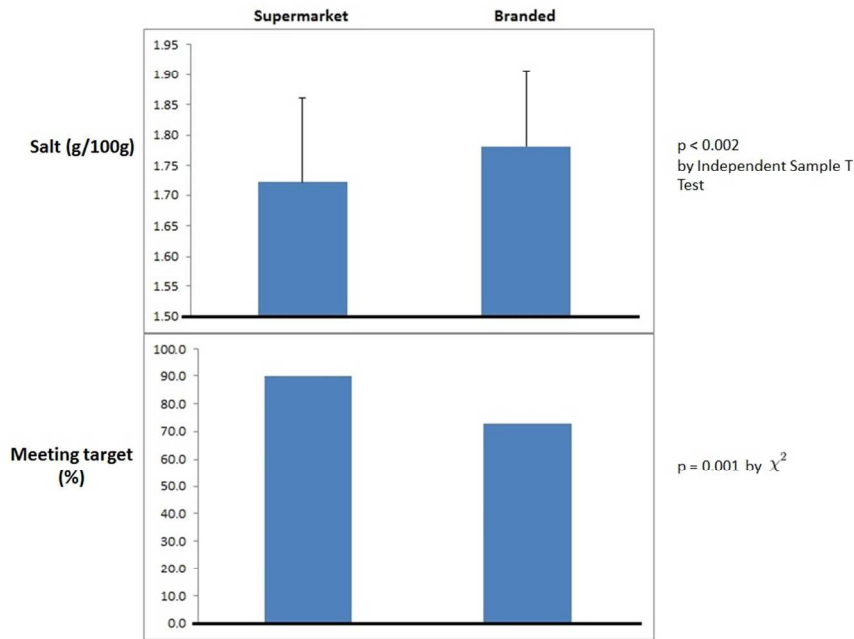

Figure 2 salt levels in supermarket and branded Cheddar and Cheddar-style cheese  
318x222mm (96 x 96 DPI)

view only

## STROBE Statement—checklist of items that should be included in reports of observational studies

|                           | Item No | Recommendation                                                                                                                                                                                                                                                                                                                                                                                                                                                         | Page Number Reported |
|---------------------------|---------|------------------------------------------------------------------------------------------------------------------------------------------------------------------------------------------------------------------------------------------------------------------------------------------------------------------------------------------------------------------------------------------------------------------------------------------------------------------------|----------------------|
| <b>Title and abstract</b> | 1       | (a) Indicate the study's design with a commonly used term in the title or the abstract                                                                                                                                                                                                                                                                                                                                                                                 | 2                    |
|                           |         | (b) Provide in the abstract an informative and balanced summary of what was done and what was found                                                                                                                                                                                                                                                                                                                                                                    | 2                    |
| <b>Introduction</b>       |         |                                                                                                                                                                                                                                                                                                                                                                                                                                                                        |                      |
| Background/rationale      | 2       | Explain the scientific background and rationale for the investigation being reported                                                                                                                                                                                                                                                                                                                                                                                   | 4-5                  |
| Objectives                | 3       | State specific objectives, including any prespecified hypotheses                                                                                                                                                                                                                                                                                                                                                                                                       | 2                    |
| <b>Methods</b>            |         |                                                                                                                                                                                                                                                                                                                                                                                                                                                                        |                      |
| Study design              | 4       | Present key elements of study design early in the paper                                                                                                                                                                                                                                                                                                                                                                                                                | 5                    |
| Setting                   | 5       | Describe the setting, locations, and relevant dates, including periods of recruitment, exposure, follow-up, and data collection                                                                                                                                                                                                                                                                                                                                        | 5-6                  |
| Participants              | 6       | (a) <i>Cohort study</i> —Give the eligibility criteria, and the sources and methods of selection of participants. Describe methods of follow-up<br><i>Case-control study</i> —Give the eligibility criteria, and the sources and methods of case ascertainment and control selection. Give the rationale for the choice of cases and controls<br><i>Cross-sectional study</i> —Give the eligibility criteria, and the sources and methods of selection of participants | Not applicable       |
|                           |         | (b) <i>Cohort study</i> —For matched studies, give matching criteria and number of exposed and unexposed<br><i>Case-control study</i> —For matched studies, give matching criteria and the number of controls per case                                                                                                                                                                                                                                                 | Not applicable       |
| Variables                 | 7       | Clearly define all outcomes, exposures, predictors, potential confounders, and effect modifiers. Give diagnostic criteria, if applicable                                                                                                                                                                                                                                                                                                                               | 5-6                  |
| Data sources/measurement  | 8*      | For each variable of interest, give sources of data and details of methods of assessment (measurement). Describe comparability of assessment methods if there is more than one group                                                                                                                                                                                                                                                                                   | 5-6                  |
| Bias                      | 9       | Describe any efforts to address potential sources of bias                                                                                                                                                                                                                                                                                                                                                                                                              | 6                    |
| Study size                | 10      | Explain how the study size was arrived at                                                                                                                                                                                                                                                                                                                                                                                                                              | Not applicable       |
| Quantitative variables    | 11      | Explain how quantitative variables were handled in the analyses. If applicable, describe which groupings were chosen and why                                                                                                                                                                                                                                                                                                                                           | 5-7                  |
| Statistical methods       | 12      | (a) Describe all statistical methods, including those used to control for confounding                                                                                                                                                                                                                                                                                                                                                                                  | 6-7                  |
|                           |         | (b) Describe any methods used to examine subgroups and interactions                                                                                                                                                                                                                                                                                                                                                                                                    | 6                    |
|                           |         | (c) Explain how missing data were addressed                                                                                                                                                                                                                                                                                                                                                                                                                            | 6                    |
|                           |         | (d) <i>Cohort study</i> —If applicable, explain how loss to follow-up was addressed<br><i>Case-control study</i> —If applicable, explain how matching of cases and controls was addressed<br><i>Cross-sectional study</i> —If applicable, describe analytical methods taking                                                                                                                                                                                           | Not applicable       |



|                          |     |                                                                                                                                                                                                              |                |
|--------------------------|-----|--------------------------------------------------------------------------------------------------------------------------------------------------------------------------------------------------------------|----------------|
|                          |     | account of sampling strategy                                                                                                                                                                                 |                |
|                          |     | (e) Describe any sensitivity analyses                                                                                                                                                                        | 6-7            |
| <b>Results</b>           |     |                                                                                                                                                                                                              |                |
| Participants             | 13* | (a) Report numbers of individuals at each stage of study—eg numbers potentially eligible, examined for eligibility, confirmed eligible, included in the study, completing follow-up, and analysed            | Not applicable |
|                          |     | (b) Give reasons for non-participation at each stage                                                                                                                                                         | Not applicable |
|                          |     | (c) Consider use of a flow diagram                                                                                                                                                                           | Not applicable |
| Descriptive data         | 14* | (a) Give characteristics of study participants (eg demographic, clinical, social) and information on exposures and potential confounders                                                                     | 7-8            |
|                          |     | (b) Indicate number of participants with missing data for each variable of interest                                                                                                                          | 7-8            |
|                          |     | (c) <i>Cohort study</i> —Summarise follow-up time (eg, average and total amount)                                                                                                                             | Not applicable |
| Outcome data             | 15* | <i>Cohort study</i> —Report numbers of outcome events or summary measures over time                                                                                                                          | Not applicable |
|                          |     | <i>Case-control study</i> —Report numbers in each exposure category, or summary measures of exposure                                                                                                         | 7-8            |
|                          |     | <i>Cross-sectional study</i> —Report numbers of outcome events or summary measures                                                                                                                           | Not applicable |
| Main results             | 16  | (a) Give unadjusted estimates and, if applicable, confounder-adjusted estimates and their precision (eg, 95% confidence interval). Make clear which confounders were adjusted for and why they were included | 7-8            |
|                          |     | (b) Report category boundaries when continuous variables were categorized                                                                                                                                    | Fig 1          |
|                          |     | (c) If relevant, consider translating estimates of relative risk into absolute risk for a meaningful time period                                                                                             | Not applicable |
| Other analyses           | 17  | Report other analyses done—eg analyses of subgroups and interactions, and sensitivity analyses                                                                                                               | 7-8 & Tab 1-5  |
| <b>Discussion</b>        |     |                                                                                                                                                                                                              |                |
| Key results              | 18  | Summarise key results with reference to study objectives                                                                                                                                                     | 8-9            |
| Limitations              | 19  | Discuss limitations of the study, taking into account sources of potential bias or imprecision. Discuss both direction and magnitude of any potential bias                                                   | 9              |
| Interpretation           | 20  | Give a cautious overall interpretation of results considering objectives, limitations, multiplicity of analyses, results from similar studies, and other relevant evidence                                   | 8-9            |
| Generalisability         | 21  | Discuss the generalisability (external validity) of the study results                                                                                                                                        | 8-9            |
| <b>Other information</b> |     |                                                                                                                                                                                                              |                |
| Funding                  | 22  | Give the source of funding and the role of the funders for the present study and, if applicable, for the original study on which the present article is based                                                | 10             |

\*Give information separately for cases and controls in case-control studies and, if applicable, for exposed and unexposed groups in cohort and cross-sectional studies.

1  
2 **Note:** An Explanation and Elaboration article discusses each checklist item and gives methodological background and  
3 published examples of transparent reporting. The STROBE checklist is best used in conjunction with this article (freely  
4 available on the Web sites of PLoS Medicine at <http://www.plosmedicine.org/>, Annals of Internal Medicine at  
5 <http://www.annals.org/>, and Epidemiology at <http://www.epidem.com/>). Information on the STROBE Initiative is  
6 available at [www.strobe-statement.org](http://www.strobe-statement.org).  
7  
8  
9  
10  
11  
12  
13  
14  
15  
16  
17  
18  
19  
20  
21  
22  
23  
24  
25  
26  
27  
28  
29  
30  
31  
32  
33  
34  
35  
36  
37  
38  
39  
40  
41  
42  
43  
44  
45  
46  
47  
48  
49  
50  
51  
52  
53  
54  
55  
56  
57  
58  
59  
60

For peer review only

# BMJ Open

## Cross-sectional survey of salt content in cheese – a major contributor to salt intake in the UK

|                                 |                                                                                                                                                                                                                                                                                                                                                                                                         |
|---------------------------------|---------------------------------------------------------------------------------------------------------------------------------------------------------------------------------------------------------------------------------------------------------------------------------------------------------------------------------------------------------------------------------------------------------|
| Journal:                        | <i>BMJ Open</i>                                                                                                                                                                                                                                                                                                                                                                                         |
| Manuscript ID:                  | bmjopen-2014-005051.R1                                                                                                                                                                                                                                                                                                                                                                                  |
| Article Type:                   | Research                                                                                                                                                                                                                                                                                                                                                                                                |
| Date Submitted by the Author:   | 29-May-2014                                                                                                                                                                                                                                                                                                                                                                                             |
| Complete List of Authors:       | Hashem, Kawther; Queen Mary University of London, Wolfson Institute of Preventive Medicine<br>He, Feng; Queen Mary University of London, Wolfson Institute of Preventive Medicine<br>Jenner, Katharine; Queen Mary University of London, Wolfson Institute of Preventive Medicine<br>MacGregor, Graham; Barts and the London School of Medicine and Dentistry, Wolfson Institute of Preventive Medicine |
| <b>Primary Subject Heading</b>: | Public health                                                                                                                                                                                                                                                                                                                                                                                           |
| Secondary Subject Heading:      | Public health, Health policy                                                                                                                                                                                                                                                                                                                                                                            |
| Keywords:                       | Public health , NUTRITION & DIETETICS, PUBLIC HEALTH                                                                                                                                                                                                                                                                                                                                                    |
|                                 |                                                                                                                                                                                                                                                                                                                                                                                                         |

SCHOLARONE™  
Manuscripts

Peer review only

1  
2  
3  
4 **Title: Cross-sectional survey of salt content in cheese – a major contributor to salt intake in the**  
5 **UK**  
6  
7

8  
9 Kawther M Hashem, Feng J He, Katharine Jenner, Graham A MacGregor  
10

11  
12 Wolfson Institute of Preventive Medicine, Barts and The London School of Medicine & Dentistry,  
13 Queen Mary University of London, UK  
14

15  
16  
17 **Running title:** Salt content of cheese in the UK  
18  
19

20  
21 Correspondence to:

22 Kawther Hashem

23 Wolfson Institute of Preventive Medicine,

24 Barts and The London School of Medicine & Dentistry,

25 Queen Mary University of London,

26 Charterhouse Square,

27 London EC1M 6BQ.

28 Tel: 44 (0)20 7882 5941

29 Fax: 44 (0)20 7882 6270

30 E-mail: k.hashem@qmul.ac.uk  
31  
32  
33  
34  
35  
36  
37  
38  
39  
40  
41  
42  
43  
44  
45  
46  
47  
48  
49  
50  
51  
52  
53  
54  
55  
56  
57  
58  
59  
60

## ABSTRACT

**Objectives:** To investigate the salt (sodium chloride) content of cheese sold in the UK supermarkets.

**Study design:** We carried out a cross-sectional survey in 2012, including 612 cheeses available in UK supermarkets.

**Methods:** The salt content (g/100g) was collected from product packaging and nutrient information panels of cheeses available in the top seven retailers.

**Results:** Salt content in cheese was high with a mean ( $\pm$ SD) of  $1.7\pm 0.58$  g/100g. There was a large variation in salt content between different types of cheeses and within the same type of cheese. On average, Halloumi ( $2.71\pm 0.34$ g/100g) and imported blue cheese ( $2.71\pm 0.83$ g/100g) contained the highest amounts of salt and Cottage cheese ( $0.55\pm 0.14$ g/100g) contained the lowest amount of salt. Overall, among the 394 cheeses that had salt reduction targets, 84.5% already met their respective Department of Health 2012 salt targets.

Cheddar and Cheddar style cheese is the most popular/biggest selling type of cheese in the UK and has the highest number of products in the analysis (N=250). On average, salt level was higher in branded compared with supermarket own brand Cheddar and Cheddar style products ( $1.78\pm 0.13$  vs  $1.72\pm 0.14$  g/100g,  $P<0.002$ ). 90% of supermarket own brand products met the 2012 target for Cheddar and Cheddar style cheese compared to 73% of branded products ( $P=0.001$ ).

**Conclusions:** Salt content of cheese in the UK is high. There is a wide variation in the salt content of cheeses and even within the same type of cheeses. Despite this, 84.5% of cheeses already met their respective 2012 targets. These findings demonstrate that much larger reductions in the amount of salt added to cheese could be made and more challenging targets need to be pushed, so that the UK can continue to lead the world in salt reduction.

Key words: cheese, reformulation, public health, food industry, salt

## ARTICLE SUMMARY

### Article focus:

- Populations around the world are consuming too much salt and in most developed countries approximately 80% of salt in the diet is from processed foods.
- The UK is leading the world with salt reduction, having already achieved a reduction in average population salt intake of 15% from 9.5g to 8.1g from 2001 to 2011, with an accompanying fall in population blood pressure and cardiovascular mortality.
- The UK food industry is working towards a set of voluntary salt reduction targets across more than 80 categories of food as part of the Government's Responsibility Deal
- Cheese is an important contributor of salt intake to the UK diet – this research was carried out to assess the salt content of cheeses sold in the UK supermarkets and compared them with the salt reduction targets

### Key messages:

- The salt content of cheese is high and there is a wide variation in salt content between different types of cheeses and within the same type of cheese.
- Among the 394 cheeses that had salt reduction targets, 84.5% already met their respective Department of Health 2012 salt targets.
- These findings demonstrate that much larger reductions in the amount of salt added to cheese could be made and much more challenging targets need to be pushed, so that the UK can continue to lead the world in salt reduction and save the maximum number of lives.

### Strengths and limitations of this study:

- This paper for the first time investigates the salt content of cheese products available in the UK supermarkets.
- This study was based on salt content data provided on cheese packaging labels in store; hence we relied on the accuracy of the data provided on the label. Therefore, it is assumed that the manufacturers provide accurate and up to date information in line with EU Regulations.

## INTRODUCTION

There is strong evidence that a high salt intake increases blood pressure and thereby increases the risk of cardiovascular disease (i.e. strokes, heart attacks and heart failure) and kidney disease.<sup>1 2</sup> A high salt intake also has other harmful effects on health, e.g. increasing the risk of stomach cancer<sup>3</sup> osteoporosis<sup>4</sup> and is indirectly linked to obesity<sup>5</sup>. Furthermore, it has been demonstrated that a reduction in population salt intake is one of the most cost-effective measures to improve public health.<sup>6</sup> Populations around the world are consuming salt in quantities that far exceed physiological requirements.<sup>7</sup> As such, the World Health Organisation (WHO) has recommended salt reduction as one of the top three priority actions to tackle the non-communicable disease crisis.<sup>8</sup> At the recent World Health Assembly, it was unanimously agreed that all countries should reduce their salt intake by 30% towards a target of 5g per day, by 2025.<sup>9</sup>

The UK has successfully developed a voluntary salt reduction programme which is considered one of “the most successful nutrition policies in the UK since the second world war”.<sup>10</sup> First developed by Consensus Action on Salt & Health (CASH), the strategy involves lowering salt intakes by a) reducing the amount of salt added to processed foods by 40% and b) reducing salt in cooking or at the table by 40%. In order to reduce average salt intake from the 9.5 g/d to the projected target of 6.0 g/d in adults, the Food Standards Agency (FSA) then set a series of progressively lower salt targets for over 80 categories of food,<sup>11 12</sup> which have now been incorporated as part of the Government’s Public Health Responsibility Salt Reduction Pledge as the ‘2012 targets’.<sup>13</sup> Other countries around the world, including Australia, United States and Canada, are adopting a similar target based approach to salt reduction<sup>7</sup>. To date, significant progress has been made by many food manufacturers and retailers in the UK, with salt content being reduced across the board, including by up to 50% in breakfast cereals, 45% in biscuits, 40% in pastry products, 25% in cakes and pasta sauces and 20% in bread.<sup>14 15</sup> Furthermore, it has been reported that less salt is being added at the table by consumers.<sup>6</sup> The average salt intake in the UK population is steadily decreasing in parallel, with intakes at 8.1g/d,<sup>16</sup> the lowest known accurate figure of any developed country (i.e. measured by 24h urinary sodium excretion),<sup>7</sup> but continues to exceed the maximum recommended limit of 6 g/d. However, this represents a 15% reduction from 2001 (9.5g).<sup>17</sup> This reduction in salt intake is accompanied by a fall in the average population blood pressure and a reduction in mortality for stroke and ischaemic heart disease<sup>18</sup>. This is estimated to be saving ≈9000 lives every year and resulting in major cost-savings to the UK economy of more than £1.5 billion per year.<sup>19</sup>

Approximately 75% of the salt consumed in the UK and other developed countries comes from processed foods, and is added by food manufacturers prior to consumer purchase.<sup>20</sup> Based on the

1  
2  
3 National Diet and Nutrition Survey, the top 10 contributors of salt intake in the UK are bread; bacon  
4 and ham; pasta, rice, pizza and other cereals; vegetables (not raw) and vegetable dishes; chicken and  
5 turkey dishes; savoury sauces, pickles, gravies and condiments; cheese; sausages; beef and veal  
6 dishes; biscuits, buns, cakes, fruit pies and pastries.<sup>21</sup> Cheese is one of the top 10 contributors and is  
7 widely consumed. In the UK, cheese production for the 12 months ending April 2013 was 376,350  
8 tonnes,<sup>22</sup> with an average person consuming 9 kg of cheese per year.<sup>21</sup> Cheese is an important  
9 contributor of salt intake. In the UK, milk and milk products are estimated to contribute about 9% of  
10 salt intake, with cheeses accounting for 44% of the salt consumption in this category and the  
11 percentage has not decreased over the last 10 years.<sup>17 21</sup> Cheese also contributes to salt intake in many  
12 other countries such as United States (3.8 - 11%),<sup>23 24</sup> Australia (4 - 7%)<sup>25 26</sup>, New Zealand (2.8%)<sup>27</sup>  
13 and Canada (3.2 - 5.4%).<sup>28 29</sup>

14  
15  
16  
17  
18  
19  
20  
21  
22  
23  
24  
25  
26  
27  
28  
29  
30  
31  
32  
33  
34  
35  
36  
37  
38  
39  
40  
41  
42  
43  
44  
45  
46  
47  
48  
49  
50  
51  
52  
53  
54  
55  
56  
57  
58  
59  
60  
Cheese is heavily marketed for its high calcium content, particularly to children.<sup>30</sup> But as cheese is  
high in salt and salt intake is the main factor increasing calcium excretion in the urine<sup>31</sup>, this claimed  
benefit requires more evidence to show the effect of cheese on the net calcium balance. Cheese is  
also a major contributor to fat and saturated fat intake in the UK diet, 6% and 10% respectively.<sup>21</sup>

Very little work has been conducted looking at the salt content of cheese in the UK. This research was  
carried out to evaluate the salt content listed on the labels of cheese products sold in the UK, report  
the variability in salt level and assess the salt levels in relation to the Department of Health 2012 salt  
reduction targets.

## METHODS

### Data Collection

The data was collected from product packaging and nutrient information panels. The survey was  
designed as a comprehensive survey of all cheeses available in a snapshot in time, using one large  
outlet per each of the 7 main retailers in the UK.

For each cheese, the data collected included the company name, product name, pack weight, serving  
size, sodium/salt per 100 grams and sodium/salt per portion. When there were missing figures, they  
were calculated where possible, e.g. the missing sodium or salt values were converted by multiplying  
by 2.5 (sodium to salt) or dividing by 2.5 (salt to sodium). All data was double checked after entry,  
and a further 5% of entries were checked against the original source in a random selection of  
products.



1  
2  
3 *Inclusion/exclusion criteria:* Data were collected from each of the major UK supermarkets (Asda,  
4 Sainsbury's, Tesco, Waitrose, Morrisons, The Co-operative and Marks and Spencer) to represent salt  
5 levels of cheese in the UK. Data were collected for supermarket own brand and branded cheese  
6 products available. However, due to resource restrictions only the data for cheddar and cheddar style  
7 cheese products were collected from Morrisons. Packaged cheese products with salt or sodium  
8 information labeled were included. Cheese products with other food components such as  
9 biscuits/crackers or ham were excluded, with the exception of Cottage cheese, cream cheese and  
10 Wensleydale traditionally produced with fruits or vegetables. Also, cheese products that contained  
11 two different types of cheese were excluded such as a product of grated mozzarella and Cheddar  
12 cheese and a Torta con Gorgonzola which is blend of Mascarpone and layered Gorgonzola cheese.  
13 When two sizes were available, the standard weight was used. Cheese types with a sample size less  
14 than 8 products with nutrient information on the packaging, found across the different supermarkets,  
15 were excluded; Jarlsberg (4 products), Mascarpone (5), Lancashire (2), Leerdammer (4), Maasdam  
16 (2), sheep, Appenzeller (1), Bavarian Smoked (1) and Ricotta (2).  
17  
18  
19  
20  
21  
22  
23  
24  
25

26 *Product categories:* Products were categorised into the following types of cheese: Brie, Camembert,  
27 Cheddar and Cheddar style, Cheshire, Cottage cheese (plain and with pineapple, chilli, pepper, onion  
28 and chives), Cream cheese (plain and with garlic, herbs, chilli, onion and chives), Double Gloucester,  
29 Edam, Emmental, Feta, Goat's cheese, Blue cheese (produced in the UK), other blue cheese (not  
30 produced in the UK), Gouda, Gruyere, Halloumi, Mozzarella, Parmesan (Grana Padano, Parmigiano  
31 Reggiano and Perorino Romano), Red Leicester, Wensleydale (plain and with fruits), Spread and  
32 other processed cheese (included singles and string cheeses). This was partially based on the criteria  
33 set by the UK Department of Health for the cheese salt reduction targets. The data was also  
34 categorised separately into supermarket own brand and branded and hard pressed with and without  
35 salt reduction targets and blue cheese with and without salt targets. The hard pressed cheese category  
36 included the following cheese types; Emmental, Wensleydale, Cheshire, hard Mozzarella  
37 Gruyere, Red Leicester, Double Gloucester, Cheddar /Cheddar style, Parmesan, Gouda, Edam and  
38 Halloumi. The blue cheese category included blue cheese produced in the UK and imported into the  
39 UK.  
40  
41  
42  
43  
44  
45  
46  
47  
48

## 49 **Statistical analysis**

### 50 *Comparison among products:*

51  
52  
53 Independent Samples T Test was used to compare the levels of salt between supermarket own brand  
54 and branded products, and hard pressed with and without salt reduction targets and blue cheese with  
55  
56  
57  
58  
59  
60

1  
2  
3 and without salt targets and cheddar cheese with and without salt targets.  
4

5  
6 Data are reported as mean, SD, range as indicated. Significance in all tests carried out was deemed  
7 significant as being  $p < 0.05$ . All data were analysed using SPSS .  
8  
9

10  
11 *Salt targets:* For each cheese type, we calculated the total number and percentage of products that met  
12 the Department of Health's 2012 salt target for cheese. We used Chi-square test to compare the  
13 proportion of supermarket own brand and branded products for Cheddar and Cheddar style cheese  
14 that met the Department of Health's 2012 salt targets.  
15  
16

## 17 18 **RESULTS**

19  
20 A total of 612 cheese products met the inclusion criteria and were included in our analysis.  
21  
22

### 23 24 **Within each type of cheese analysis**

25  
26  
27 Figure 1 shows the salt level in different types of cheeses per 100g. Salt content in cheese was high  
28 and there was a large variation in salt content between different types of cheeses and within the same  
29 type of cheese. On average, eight out of 23 types of cheese contain more than 2g of salt per 100g;  
30 Halloumi ( $2.71 \pm 0.34\text{g}/100\text{g}$ ) and imported blue cheese ( $2.71 \pm 0.83\text{g}/100\text{g}$ ) contained the highest  
31 amounts of salt. Whereas, only three types of cheeses contained less than 1g of salt per 100g; Cottage  
32 cheese ( $0.55\text{g}$ ) contained the lowest amount of salt.  
33  
34  
35  
36

37  
38 Table 1 compares the salt levels for each type of cheese between supermarket and branded products.  
39 10 out of the 23 types of cheeses had a large enough sample size to analyse further, of these, seven  
40 showed a higher salt level in branded than supermarket own brand products and three showed that  
41 supermarket own products had a higher salt level.  
42  
43  
44

45  
46 Cheddar and Cheddar style cheese is the major type of cheese in the UK and has the highest number  
47 of products in our analysis. The salt level in branded Cheddar and Cheddar style was 3.5% higher than  
48 supermarket own brand ( $p < 0.001$ ) (figure 2).  
49  
50

### 51 52 **Comparing with the 2012 targets**

53  
54 Among 23 types of cheese, 10 types had salt targets and 13 did not have targets. Overall, cheeses with  
55 targets had significantly lower levels of salt compared to those without targets (Table 2). Hard pressed  
56  
57

1  
2  
3 cheese and blue cheeses with targets also had significantly lower levels of salt compared to those  
4 without targets (Table 2).  
5  
6

7  
8 Table 3 shows the cheese products meeting the Department of Health 2012 salt targets. Within each  
9 cheese category, the average salt level was lower in products that met the targets compared to  
10 products that did not meet the target. Overall, among the 394 cheeses that had salt reduction targets,  
11 84.5% already met their respective 2012 targets. There are three cheese types where all of the  
12 products surveyed have met the 2012 targets (Table 3) and a larger proportion of cheese types are  
13 close to meeting the 2012 targets. However, only Double Gloucester (60%) and other processed  
14 cheeses, includes singles and strings (54.5%) had the lowest proportion of products meeting the  
15 targets.  
16  
17  
18  
19

20  
21 Table 4 compares the supermarket and branded products that met the 2012 targets. A greater number  
22 of supermarket own brand products (90%) compared to branded products (73%) met the target for  
23 Cheddar and Cheddar style cheese (Figure 2).  
24  
25  
26

## 27 DISCUSSION

28  
29 Salt content in cheeses was found to be high and there was a large variation in salt content between  
30 different types of cheeses and within the same type of cheese. In most types of cheese, branded cheese  
31 had a higher salt level compared with supermarket own. Overall, among the 394 cheeses that had salt  
32 reduction targets, 84.5% already met their respective 2012 targets. Furthermore, 90% of supermarket  
33 own brand products met the target for Cheddar and Cheddar style cheese compared to 73% of branded  
34 products.  
35  
36  
37  
38

39  
40 Our finding of a high salt content in cheeses sold in the UK is similar to those observed in the USA,<sup>32</sup>  
41 <sup>33</sup> Australia,<sup>34</sup> France,<sup>35</sup> Belgium,<sup>36</sup> Canada,<sup>37</sup> New Zealand,<sup>38</sup> South Africa<sup>39</sup> and Brazil<sup>40</sup> showing  
42 that high levels of salt in cheese is a global challenge.  
43  
44

45  
46 Salt has been claimed to be important in the flavour, texture, structure, acceptability, shelf-life and  
47 safety of cheese.<sup>41-43</sup> But the development of cheese with lower salt content has been thriving.<sup>44-50</sup>  
48 Studies describing the reduction of salt in Cheddar cheese are limited, despite the importance of this  
49 cheese in the British diet. Those studies that exist involve reducing salt in cheddar cheese<sup>51</sup> or the  
50 addition of other compounds that can function in ways similar to salt (sodium chloride), such as  
51 potassium chloride,<sup>44 52-56</sup> magnesium chloride and calcium chloride.<sup>57 58</sup>  
52  
53  
54  
55  
56  
57  
58  
59  
60

1  
2  
3 Supermarket own brand cheese have been produced with lower levels of salt, which demonstrates that  
4 – despite claims to the contrary - delivering salt reduction appears not to be a technical issue related to  
5 cheese manufacture. Corporate decisions about food composition are often based upon factors such as  
6 common practice, taste and price, rather than health. However, evidence suggests that where salt  
7 reductions are made gradually in products, no change in consumer preference is reported.<sup>59 60</sup>  
8  
9

10  
11  
12 Our paper, using the example of one of the top 10 contributors of salt to the UK diet – cheese,  
13 demonstrates that a national target based approach to reformulation can be a successful method for  
14 reducing the salt content in food. Our findings show that the cheese types with salt targets contained  
15 less salt than cheese types without salt targets, suggest that the targets have helped focus and drive the  
16 manufacturer to reduce their salt levels. There were three cheese types where all of the products  
17 surveyed have met the 2012 targets (Table 3) and a large proportion of cheese types are close to  
18 meeting the 2012 targets. Therefore the Department of Health has recently reset the targets to lower  
19 levels. However, not all cheese types sold in the UK (Appendix 1) have a salt target, unlike in other  
20 countries such as the New York City salt reduction targets, where they have included a target for  
21 parmesan type of cheese.<sup>61</sup> Also, some of UK cheese salt targets are less ambitious when compared  
22 to New York City salt reduction targets, particularly the main target in this food category, which is for  
23 hard pressed cheeses such as Cheddar cheese. In the UK the target is 1.8g/100g but in New York it is  
24 1.58g/100g for 2012 and 1.5g/100g for 2014. Furthermore, the sales weighted mean (1.67g) is lower  
25 than the average found in our study and lower than the UK 2012 salt target. There is a bigger variation  
26 in the cheese types without targets (18-500%); setting an average target (suggest 30% reduction on the  
27 highest available products) would narrow this variability.  
28  
29  
30  
31  
32  
33  
34  
35  
36  
37

### 38 **LIMITATIONS**

39 Our study was based on salt content data provided on cheese packaging labels in store; hence we  
40 relied on the accuracy of the data provided on the label. Therefore, it is assumed that the  
41 manufacturers provide accurate and up to date information in line with EU Regulations. However,  
42 further study should include salt content determined through laboratory analysis to achieve a better  
43 understanding of the true salt content. When collecting data we did not capture ingredients list, this  
44 means we are unable to ascertain if salt has been replaced with any other ingredients/additives in the  
45 cheese that came out lowest. Such data should be collected in future surveys. Additionally the salt  
46 content of cheese is likely to differ across countries; our data is primarily relevant to the UK.  
47  
48 Nevertheless, the results of this study are relevant and serve to document the salt content of cheese  
49 products sold in UK supermarkets, providing a foundation for future studies and providing  
50 information for programs and the dairy industry to potentially move toward the reformulation of these  
51 products.  
52  
53  
54  
55  
56  
57  
58  
59  
60

## CONCLUSION

This research demonstrates that salt content of cheese in the UK is high and there is a wide variation in the salt content of cheeses and even within the same type of cheeses. Despite this, 84.5% of cheeses already met their respective 2012 targets. These findings demonstrate that much larger reductions in the amount of salt added to cheese could be made and much more challenging targets need to be set.

Other countries around the world now need to follow suit and develop a target based approach to reducing salt content of processed foods. While the food category emphasis may differ between countries, the concept of using salt targets to achieve a 'level playing field' amongst the industry is universal. A product like cheese is widely consumed internationally and this research demonstrates the variability in salt levels within each type and how targets can help to lower the levels of salt.

## AUTHOR CONTRIBUTIONS

GM and KJ conceived the idea and designed research; KH conducted research; KH and FH analysed data; KH wrote the first draft of the manuscript and all authors contributed to the interpretation of the results and revision of the manuscript, and approved the final manuscript. GM had primary responsibility for final content.

Funding: None

## FUNDING STATEMENT

This research received no specific grant from any funding agency in the public, commercial or not-for-profit sectors

## COMPETING INTERESTS

All authors have completed the ICMJE uniform disclosure form at [www.icmje.org/coi\\_disclosure.pdf](http://www.icmje.org/coi_disclosure.pdf) (available on request from the corresponding author) and declare: no support from any organisation for the submitted work; no financial relationships with any organisations that might have an interest in the submitted work in the previous three years. KH and KJ are employees of Consensus Action on Salt & Health (CASH), a nonprofit charitable organisation. FH is a member of CASH and its international branch World Action on Salt & Health (WASH) and does not receive any financial support from CASH or WASH. MacGregor GA is Chairman of Blood Pressure UK (BPUK), Chairman of CASH and Chairman of WASH. BPUK, CASH and WASH are nonprofit charitable organisations. GM does not receive any financial support from any of these organisations.

1  
2  
3  
4 **DATA SHARING STATEMENT**  
5  
6

7 Extra data is available by emailing Kawther Hashem on [k.hashem@qmul.ac.uk](mailto:k.hashem@qmul.ac.uk).  
8  
9

10  
11 **Legend for figure 1: salt levels (g/100g) in each type of cheese**

12 **Legend for figure 2: salt levels (mean  $\pm$  SD) and percentage meeting salt targets in supermarket**  
13 **and branded Cheddar and Cheddar-style cheese**  
14  
15  
16  
17  
18  
19  
20  
21  
22  
23  
24  
25  
26  
27  
28  
29  
30  
31  
32  
33  
34  
35  
36  
37  
38  
39  
40  
41  
42  
43  
44  
45  
46  
47  
48  
49  
50  
51  
52  
53  
54  
55  
56  
57  
58  
59  
60

**Table 1 Salt levels (g/100g) for each type of cheese between supermarket and branded products.**

| Cheese type            | Supermarket |           | Branded |           |
|------------------------|-------------|-----------|---------|-----------|
|                        | N           | Mean±SD   | N       | Mean±SD   |
| Camembert              | 12          | 1.63±0.16 | 4       | 1.49±0.01 |
| Cheddar /Cheddar style | 187         | 1.72±0.14 | 63      | 1.78±0.13 |
| Other processed        | 14          | 2.48±0.38 | 8       | 2.01±0.44 |
| Cheese Spread          | 7           | 1.89±0.28 | 12      | 1.88±0.31 |
| Cream cheese           | 14          | 0.68±0.24 | 5       | 0.86±0.13 |
| Edam                   | 12          | 2.38±0.28 | 4       | 2.01±0.28 |
| Emmental               | 5           | 0.60±0.14 | 4       | 1.66±0.28 |
| Feta                   | 18          | 2.51±0.58 | 4       | 2.52±0.71 |
| Goat's cheese          | 16          | 1.23±0.40 | 4       | 1.24±0.58 |
| Mozzarella             | 18          | 0.65±0.33 | 4       | 1.16±0.35 |

**Table 2 Salt levels in cheese with and without salt targets (g/100g)**

| Cheese type         | With target |           | Without target |           | p value |
|---------------------|-------------|-----------|----------------|-----------|---------|
|                     | N           | Mean±SD   | N              | Mean±SD   |         |
| <b>All</b>          | 394         | 1.66±0.42 | 218            | 1.78±0.79 | 0.04    |
| <b>Hard pressed</b> | 303         | 1.70±0.20 | 99             | 1.96±0.72 | 0.00    |
| <b>Blue cheese*</b> | 15          | 2.02±0.09 | 13             | 2.71±0.83 | 0.01    |

\* The blue cheese category here included blue cheese produced in the UK and imported into the UK.



Table 3 cheese products meeting the Department of Health 2012 salt targets

| Cheese type                   | 2012 salt target<br>(g/100g) | Number<br>of<br>products | Meeting target |         |                     |
|-------------------------------|------------------------------|--------------------------|----------------|---------|---------------------|
|                               |                              |                          | N              | percent | Mean±SD<br>(g/100g) |
| <b>Cheddar /Cheddar style</b> | 1.8                          | 250                      | 214            | 85.6    | 1.71±0.12           |
| <b>Other processed</b>        | 2                            | 22                       | 12             | 54.5    | 1.93±0.17           |
| <b>Cheese Spread</b>          | 2.25                         | 19                       | 19             | 100     | 1.88±0.29           |
| <b>Cheshire</b>               | 1.8                          | 8                        | 8              | 100     | 1.43 n/a            |
| <b>Cottage cheese</b>         | 0.63                         | 16                       | 14             | 87.5    | 0.51±0.03           |
| <b>Cream cheese</b>           | 0.75                         | 19                       | 14             | 73.7    | 0.61±0.07           |
| <b>Double Gloucester</b>      | 1.8                          | 10                       | 6              | 60.0    | 1.58±0.14           |
| <b>Red Leicester</b>          | 1.80                         | 21                       | 18             | 85.7    | 1.69±0.11           |
| <b>Blue cheese</b>            | 2.10                         | 15                       | 14             | 93.3    | 2.00±0.02           |
| <b>Wensleydale</b>            | 1.80                         | 14                       | 14             | 100     | 1.13 n/a            |
| <b>Overall</b>                | n/a                          | 394                      | 333            | 84.5%   | 1.61±0.38           |

Table 4 Percentage of supermarket and branded products that meet the 2012 targets

| Cheese type            | 2012 salt target<br>(g/100g) | Meeting target |                 |    |             |
|------------------------|------------------------------|----------------|-----------------|----|-------------|
|                        |                              | N              | Supermarket (%) | N  | Branded (%) |
| Cheddar /Cheddar style | 1.8                          | 168            | 90              | 46 | 73          |
| Other processed        | 2.0                          | 5              | 36              | 7  | 88          |
| Cheese Spread          | 2.25                         | 7              | 100             | 12 | 100         |
| Cheshire               | 1.8                          | 8              | 100             | 0  | n/a         |
| Cottage cheese         | 0.63                         | 14             | 93              | 0  | n/a         |
| Cream cheese           | 0.75                         | 12             | 86              | 2  | 40          |
| Double Gloucester      | 1.8                          | 6              | 100             | 0  | n/a         |
| Red Leicester          | 1.8                          | 17             | 85              | 1  | 100         |
| Blue cheese            | 2.1                          | 12             | 92              | 2  | 100         |
| Wensleydale            | 1.8                          | 13             | 100             | 1  | 100         |

1  
2  
3  
4  
5  
6  
7  
8  
9  
10  
11  
12  
13  
14  
15  
16  
17  
18  
19  
20  
21  
22  
23  
24  
25  
26  
27  
28  
29  
30  
31  
32  
33  
34  
35  
36  
37  
38  
39  
40  
41  
42  
43  
44  
45  
46  
47  
48  
49  
50  
51  
52  
53  
54  
55  
56  
57  
58  
59  
60  
**REFERENCE**

1. He FJ, MacGregor GA. Reducing population salt intake worldwide: from evidence to implementation. *Prog Cardiovasc Dis* 2010;52:363-82.
2. He FJ, MacGregor GA. Salt reduction lowers cardiovascular risk: meta-analysis of outcome trials. *Lancet* 2011;378:380-2.
3. D'Elia L, Rossi G, Ippolito R, et al. Habitual salt intake and risk of gastric cancer: a meta-analysis of prospective studies. *Clin Nutr* 2012;31:489-98.
4. Devine A, Criddle RA, Dick IM, et al. A longitudinal study of the effect of sodium and calcium intakes on regional bone density in postmenopausal women. *The American journal of clinical nutrition* 1995;62:740-5.
5. He FJ, Marrero NM, MacGregor GA. Salt intake is related to soft drink consumption in children and adolescents: A link to obesity? *Hypertension* 2008;51:E55-E55.
6. Asaria P, Chisholm D, Mathers C, et al. Chronic disease prevention: health effects and financial costs of strategies to reduce salt intake and control tobacco use. *Lancet* 2007;370:2044-53.
7. Webster JL, Dunford EK, Hawkes C, et al. Salt reduction initiatives around the world. *J Hypertens* 2011;29:1043-50.
8. Beaglehole R, Bonita R, Horton R, et al. Priority actions for the non-communicable disease crisis. *Lancet* 2011;377:1438-47.
9. SIXTY-SIXTH WORLD HEALTH ASSEMBLY. Follow-up to the Political Declaration of the High-level Meeting of the General Assembly on the Prevention and Control of Non-communicable Diseases. . [http://apps.who.int/gb/ebwha/pdf\\_files/WHA66/A66\\_R10-en.pdf](http://apps.who.int/gb/ebwha/pdf_files/WHA66/A66_R10-en.pdf) (accessed 26 September 2013).
10. Winkler JT. Obesity expose offers slim pickings. *Bmj* 2012;345:e4465-e65.
11. Salt reduction targets: March 2006. London, UK: Food Standards Agency. 2006. <http://www.food.gov.uk/multimedia/pdfs/salttargetsapril06.pdf> (accessed 29 July 2013).
12. Food Standards Agency. Agency Publishes 2012 salt reduction targets, 8 May 2009. [www.food.gov.uk/news/newsarchive/2009/may/salttargets](http://www.food.gov.uk/news/newsarchive/2009/may/salttargets) (accessed 29 July 2013).
13. Department of Health Responsibility Deal, 27 July 2012. <https://responsibilitydeal.dh.gov.uk/pledges/pledge/?pl=9> (accessed 29 July 2013).
14. He FJ, Brinsden HC, Macgregor GA. Salt reduction in the United Kingdom: a successful experiment in public health. *Journal of human hypertension* 2014;28:345-52.
15. Brinsden HC, He FJ, Jenner KH, et al. Surveys of the salt content in UK bread: progress made and further reductions possible. *BMJ open* 2013;3.
16. Department of Health: Assessment of Dietary Sodium Levels Among Adults (aged 19-64) in England, 2011 <http://transparency.dh.gov.uk/2012/06/21/sodium-levels-among-adults/> (accessed 29 July 2013).
17. Henderson L IK, Gregory J, Bates CJ, et al. *National Diet & Nutrition Survey: Adults aged 19 to 64*: London: TSO, 2003.
18. He FJ, Pombo-Rodrigues S, Macgregor GA. Salt reduction in England from 2003 to 2011: its relationship to blood pressure, stroke and ischaemic heart disease mortality. *BMJ open* 2014;4:e004549.

19. National Institute for Health and Clinical Excellence (NICE). Guidance on the prevention of cardiovascular disease at the population level. . <http://guidance.nice.org.uk/PH25> (accessed 26 September 2013).
20. James WP, Ralph A, Sanchez-Castillo CP. The dominance of salt in manufactured food in the sodium intake of affluent societies. *Lancet* 1987;1:426-9.
21. National Diet and Nutrition Survey: Headline results from Years 1 and 2 (combined) of the rolling programme 2008/9 - 2009/10. [https://www.gov.uk/government/uploads/system/uploads/attachment\\_data/file/216485/dh\\_128556.pdf](https://www.gov.uk/government/uploads/system/uploads/attachment_data/file/216485/dh_128556.pdf) (accessed 11 November 2013).
22. DairyCo. <http://www.dairyco.org.uk/market-information/processing-trade/dairy-product-production/uk-dairy-product-production/>.
23. Sodium Intake Among Adults --- United States, 2005-2006. [http://www.cdc.gov/mmwr/preview/mmwrhtml/mm5924a4.htm?s\\_cid=mm5924a4\\_e%0D%0A](http://www.cdc.gov/mmwr/preview/mmwrhtml/mm5924a4.htm?s_cid=mm5924a4_e%0D%0A).
24. CDC. Centers for disease control and prevention: vital signs: food categories contributing the most to sodium consumption— United States, 2007–2008. *MMWR Morb Mortal Wkly Rep* 2012;61:92–8.
25. Grimes CA, Campbell KJ, Riddell LJ, et al. Sources of sodium in Australian children's diets and the effect of the application of sodium targets to food products to reduce sodium intake. *Br J Nutr* 2011;105:468-77.
26. Charlton K, Yeatman H, Houweling F, et al. Urinary sodium excretion, dietary sources of sodium intake and knowledge and practices around salt use in a group of healthy Australian women. *Aust N Z J Public Health* 2010;34:356-63.
27. Ministry of Health and the University of Auckland. Nutrition and the burden of disease: New Zealand 1997–2011. Wellington: Ministry of Health, 2003. . [http://www.moh.govt.nz/notebook/nbbooks.nsf/0/A8D85BC5BAD17610CC256D970072A0AA/\\$file/](http://www.moh.govt.nz/notebook/nbbooks.nsf/0/A8D85BC5BAD17610CC256D970072A0AA/$file/).
28. Garriguet D. Sodium consumption at all ages <http://www.statcan.gc.ca/pub/82-003-x/2006004/article/sodium/4148995-eng.htm>.
29. Fischer PWF, Vigneault M, Huang R, et al. Sodium food sources in the Canadian diet. *Applied Physiology Nutrition and Metabolism-Physiologie Appliquee Nutrition Et Metabolisme* 2009;34:884-92.
30. Aktas Arnas Y. The effects of television food advertisement on children's food purchasing requests. *Pediatr Int* 2006;48:138-45.
31. Cappuccio FP, Kalaitzidis R, Dunclift S, et al. Unravelling the links between calcium excretion, salt intake, hypertension, kidney stones and bone metabolism. *J Nephrol* 2000;13:169-77.
32. Agarwal S, McCoy D, Graves W, et al. Sodium content in retail Cheddar, Mozzarella, and process cheeses varies considerably in the United States. *J Dairy Sci* 2011;94:1605-15.
33. Moshfegh AJ, Holden, J. M., Cogswell, M. E., et al. Vital signs: food categories contributing the most to sodium consumption - United States, 2007-2008. *MMWR Morb Mortal Wkly Rep* 2012;61:92-8.
34. Grimes CA, Nowson CA, Lawrence M. An evaluation of the reported sodium content of Australian food products. *International Journal of Food Science and Technology* 2008;43:2219-29.
35. Chekri R, Noel L, Millour S, et al. Calcium, magnesium, sodium and potassium levels in foodstuffs from the second French Total Diet Study. *Journal of Food Composition and Analysis* 2012;25:97-107.
36. Huybrechts I, De Keyzer W, Lin Y, et al. Food sources and correlates of sodium and potassium intakes in Flemish pre-school children. *Public Health Nutr* 2012;15:1039-46.
37. Tanase CM, Griffin P, Koski KG, et al. Sodium and potassium in composite food samples from the Canadian Total Diet Study. *Journal of Food Composition and Analysis* 2011;24:237-43.

- 1  
2  
3 38. Thomson BM, Vannoort RW, Haslemore RM. Dietary exposure and trends of exposure to  
4 nutrient elements iodine, iron, selenium and sodium from the 2003-4 New Zealand Total  
5 Diet Survey. *Br J Nutr* 2008;99:614-25.
- 6 39. Charlton KE, Steyn K, Levitt NS, et al. Diet and blood pressure in South Africa: Intake of foods  
7 containing sodium, potassium, calcium, and magnesium in three ethnic groups. *Nutrition*  
8 2005;21:39-50.
- 9 40. Felicio TL, Esmerino EA, Cruz AG, et al. Cheese. What is its contribution to the sodium intake of  
10 Brazilians? *Appetite* 2013;66:84-88.
- 11 41. Pastorino AJ, Hansen CL, McMahon DJ. Effect of salt on structure-function relationships of  
12 cheese. *J Dairy Sci* 2003;86:60-9.
- 13 42. Ilhak OI, Oksuztepe G, Calicioglu M, et al. Effect of Acid Adaptation and Different Salt  
14 Concentrations on Survival of *Listeria Monocytogenes* in Turkish White Cheese. *Journal of*  
15 *Food Quality* 2011;34:379-85.
- 16 43. Shrestha S, Grieder JA, McMahon DJ, et al. Survival of *Salmonella* Serovars Introduced as a Post-  
17 Aging Contaminant during Storage of Low-Salt Cheddar Cheese at 4, 10, and 21 degrees C.  
18 *Journal of Food Science* 2011;76:M616-M21.
- 19 44. Grummer J, Bobowski N, Karalus M, et al. Use of potassium chloride and flavor enhancers in low  
20 sodium Cheddar cheese. *Journal of Dairy Science* 2013;96:1401-18.
- 21 45. Ayyash MM, Sherkat F, Shah NP. Effect of partial NaCl substitution with KCl on the texture  
22 profile, microstructure, and sensory properties of low-moisture mozzarella cheese. *Journal*  
23 *of Dairy Research* 2013;80:7-13.
- 24 46. Karimi R, Mortazavian AM, Karami M. Incorporation of *Lactobacillus casei* in Iranian ultrafiltered  
25 Feta cheese made by partial replacement of NaCl with KCl. *Journal of Dairy Science*  
26 2012;95:4209-22.
- 27 47. Ayyash MM, Shah NP. The effect of substitution of NaCl with KCl on chemical composition and  
28 functional properties of low-moisture Mozzarella cheese. *Journal of Dairy Science*  
29 2011;94:3761-68.
- 30 48. Ayyash MM, Shah NP. Effect of Partial Substitution of NaCl with KCl on Proteolysis of Halloumi  
31 Cheese. *Journal of Food Science* 2011;76:C31-C37.
- 32 49. Gomes AP, Cruz AG, Cadena RS, et al. Manufacture of low-sodium Minas fresh cheese: Effect of  
33 the partial replacement of sodium chloride with potassium chloride. *Journal of Dairy Science*  
34 2011;94:2701-06.
- 35 50. Van Dender AGF, Spadoti LM, Zacarchenco PB, et al. Optimisation of the manufacturing of  
36 processed cheese without added fat and reduced sodium. *Australian Journal of Dairy*  
37 *Technology* 2010;65:217-21.
- 38 51. Rulikowska A, Kilcawley KN, Doolan IA, et al. The impact of reduced sodium chloride content on  
39 Cheddar cheese quality. *International Dairy Journal* 2013;28:45-55.
- 40 52. Hystead E, Diez-Gonzalez F, Schoenfuss TC. The effect of sodium reduction with and without  
41 potassium chloride on the survival of *Listeria monocytogenes* in Cheddar cheese. *J Dairy Sci*  
42 2013.
- 43 53. Lu Y. "Effects of sodium chloride salting and substitution with potassium chloride on whey  
44 expulsion of cheese" All Graduate Theses and Dissertations. Paper 1285. 2012.  
45 <http://digitalcommons.usu.edu/etd/1285>.
- 46 54. Lindsay RC, Hargett SM, Bush CS. Effect of Sodium-Potassium (1 - 1) Chloride and Low Sodium-  
47 Chloride Concentrations on Quality of Cheddar Cheese. *Journal of Dairy Science*  
48 1982;65:360-70.
- 49 55. Reddy KA, Marth EH. Microflora of Cheddar Cheese Made with Sodium-Chloride, Potassium-  
50 Chloride, or Mixtures of Sodium and Potassium-Chloride. *Journal of Food Protection*  
51 1995;58:54-61.
- 52  
53  
54  
55  
56  
57  
58  
59  
60

- 1  
2  
3 56. Reddy KA, Marth EH. Lactic-Acid Bacteria in Cheddar-Cheese Made with Sodium-Chloride,  
4 Potassium-Chloride or Mixtures of the 2 Salts. *Journal of Food Protection* 1995;58:62-69.  
5 57. Grummer J, Karalus M, Zhang K, et al. Manufacture of reduced-sodium Cheddar-style cheese  
6 with mineral salt replacers. *Journal of Dairy Science* 2012;95:2830-39.  
7 58. Fitzgerald E, Buckley J. Effect of Total and Partial Substitution of Sodium-Chloride on the Quality  
8 of Cheddar Cheese. *Journal of Dairy Science* 1985;68:3127-34.  
9 59. Girgis S, Neal B, Prescott J, et al. A one-quarter reduction in the salt content of bread can be  
10 made without detection. *Eur J Clin Nutr* 2003;57:616-20.  
11 60. Liem DG, Miremadi F, Keast RS. Reducing sodium in foods: the effect on flavor. *Nutrients*  
12 2011;3:694-711.  
13 61. National Salt Reduction Initiative packed food categories and targets  
14 <http://www.nyc.gov/html/doh/downloads/pdf/cardio/packaged-food-targets.pdf> (accessed  
15 28th August 2013).  
16  
17  
18  
19  
20  
21  
22  
23  
24  
25  
26  
27  
28  
29  
30  
31  
32  
33  
34  
35  
36  
37  
38  
39  
40  
41  
42  
43  
44  
45  
46  
47  
48  
49  
50  
51  
52  
53  
54  
55  
56  
57  
58  
59  
60

1  
2  
3  
4 **Title: Cross-sectional survey of salt content in cheese – a major contributor to salt intake in the**  
5 **UK**  
6  
7

8  
9 Kawther M Hashem, Feng J He, Katharine Jenner, Graham A MacGregor  
10

11  
12 Wolfson Institute of Preventive Medicine, Barts and The London School of Medicine & Dentistry,  
13 Queen Mary University of London, UK  
14

15  
16  
17 **Running title:** Salt content of cheese in the UK  
18  
19

20  
21 Correspondence to:

22 Kawther Hashem

23 Wolfson Institute of Preventive Medicine,

24 Barts and The London School of Medicine & Dentistry,

25 Queen Mary University of London,

26 Charterhouse Square,

27 London EC1M 6BQ.

28 Tel: 44 (0)20 7882 5941

29 Fax: 44 (0)20 7882 6270

30 E-mail: k.hashem@qmul.ac.uk  
31  
32  
33  
34  
35  
36  
37  
38  
39  
40  
41  
42  
43  
44  
45  
46  
47  
48  
49  
50  
51  
52  
53  
54  
55  
56  
57  
58  
59  
60

**ABSTRACT**

**Objectives:** To investigate the salt (sodium chloride) content of cheese sold in the UK supermarkets.

**Study design:** We carried out a cross-sectional survey in 2012, including 612 cheeses available in UK supermarkets.

**Methods:** The salt content (g/100g) was collected from product packaging and nutrient information panels of cheeses available in the top seven retailers.

**Results:** Salt content in cheese was high with a mean ( $\pm$ SD) of  $1.7\pm 0.58$  g/100g. There was a large variation in salt content between different types of cheeses and within the same type of cheese. On average, Halloumi ( $2.71\pm 0.34$ g/100g) and imported blue cheese ( $2.71\pm 0.83$ g/100g) contained the highest amounts of salt and Cottage cheese ( $0.55\pm 0.14$ g/100g) contained the lowest amount of salt. Overall, among the 394 cheeses that had salt reduction targets, 84.5% already met their respective Department of Health 2012 salt targets.

Cheddar and Cheddar style cheese is the most popular/biggest selling type of cheese in the UK and has the highest number of products in the analysis (N=250). On average, salt level was higher in branded compared with supermarket own brand Cheddar and Cheddar style products ( $1.78\pm 0.13$  vs  $1.72\pm 0.14$  g/100g,  $P<0.002$ ). 90% of supermarket own brand products met the 2012 target for Cheddar and Cheddar style cheese compared to 73% of branded products ( $P=0.001$ ).

**Conclusions:** Salt content of cheese in the UK is high. There is a wide variation in the salt content of cheeses and even within the same type of cheeses. Despite this, 84.5% of cheeses already met their respective 2012 targets. These findings demonstrate that much larger reductions in the amount of salt added to cheese could be made and more challenging targets need to be pushed, so that the UK can continue to lead the world in salt reduction.

Key words: cheese, reformulation, public health, food industry, salt



## ARTICLE SUMMARY

### Article focus:

- Populations around the world are consuming too much salt and in most developed countries approximately 80% of salt in the diet is from processed foods.
- The UK is leading the world with salt reduction, having already achieved a reduction in average population salt intake of 15% from 9.5g to 8.1g from 2001 to 2011, with an accompanying fall in population blood pressure and cardiovascular mortality.
- The UK food industry is working towards a set of voluntary salt reduction targets across more than 80 categories of food as part of the Government's Responsibility Deal
- Cheese is an important contributor of salt intake to the UK diet – this research was carried out to assess the salt content of cheeses sold in the UK supermarkets and compared them with the salt reduction targets

### Key messages:

- The salt content of cheese is high and there is a wide variation in salt content between different types of cheeses and within the same type of cheese.
- Among the 394 cheeses that had salt reduction targets, 84.5% already met their respective Department of Health 2012 salt targets.
- These findings demonstrate that much larger reductions in the amount of salt added to cheese could be made and much more challenging targets need to be pushed, so that the UK can continue to lead the world in salt reduction and save the maximum number of lives.

### Strengths and limitations of this study:

- This paper for the first time investigates the salt content of cheese products available in the UK supermarkets.
- This study was based on salt content data provided on cheese packaging labels in store; hence we relied on the accuracy of the data provided on the label. Therefore, it is assumed that the manufacturers provide accurate and up to date information in line with EU Regulations.

## INTRODUCTION

There is strong evidence that a high salt intake increases blood pressure and thereby increases the risk of cardiovascular disease (i.e. strokes, heart attacks and heart failure) and kidney disease.<sup>1 2</sup> A high salt intake also has other harmful effects on health, e.g. increasing the risk of stomach cancer<sup>3</sup> osteoporosis<sup>4</sup> and is indirectly linked to obesity<sup>5</sup>. Furthermore, it has been demonstrated that a reduction in population salt intake is one of the most cost-effective measures to improve public health.<sup>6</sup> Populations around the world are consuming salt in quantities that far exceed physiological requirements.<sup>7</sup> As such, the World Health Organisation (WHO) has recommended salt reduction as one of the top three priority actions to tackle the non-communicable disease crisis.<sup>8</sup> At the recent World Health Assembly, it was unanimously agreed that all countries should reduce their salt intake by 30% towards a target of 5g per day, by 2025.<sup>9</sup>

The UK has successfully developed a voluntary salt reduction programme which is considered one of “the most successful nutrition policies in the UK since the second world war”.<sup>10</sup> First developed by Consensus Action on Salt & Health (CASH), the strategy involves lowering salt intakes by a) reducing the amount of salt added to processed foods by 40% and b) reducing salt in cooking or at the table by 40%. In order to reduce average salt intake from the 9.5 g/d to the projected target of 6.0 g/d in adults, the Food Standards Agency (FSA) then set a series of progressively lower salt targets for over 80 categories of food,<sup>11 12</sup> which have now been incorporated as part of the Government’s Public Health Responsibility Salt Reduction Pledge as the ‘2012 targets’.<sup>13</sup> Other countries around the world, including Australia, United States and Canada, are adopting a similar target based approach to salt reduction<sup>7</sup>. To date, significant progress has been made by many food manufacturers and retailers in the UK, with salt content being reduced across the board, including by up to 50% in breakfast cereals, 45% in biscuits, 40% in pastry products, 25% in cakes and pasta sauces and 20% in bread.<sup>14 15</sup> Furthermore, it has been reported that less salt is being added at the table by consumers.<sup>6</sup> The average salt intake in the UK population is steadily decreasing in parallel, with intakes at 8.1g/d,<sup>16</sup> the lowest known accurate figure of any developed country (i.e. measured by 24h urinary sodium excretion),<sup>7</sup> but continues to exceed the maximum recommended limit of 6 g/d. However, this represents a 15% reduction from 2001 (9.5g).<sup>17</sup> This reduction in salt intake is accompanied by a fall in the average population blood pressure and a reduction in mortality for stroke and ischaemic heart disease<sup>18</sup>. This is estimated to be saving ≈9000 lives every year and resulting in major cost-savings to the UK economy of more than £1.5 billion per year.<sup>19</sup>

Approximately 75% of the salt consumed in the UK and other developed countries comes from processed foods, and is added by food manufacturers prior to consumer purchase.<sup>20</sup> **Based on the**

1  
2  
3 National Diet and Nutrition Survey, the top 10 contributors of salt intake in the UK are bread; bacon  
4 and ham; pasta, rice, pizza and other cereals; vegetables (not raw) and vegetable dishes; chicken and  
5 turkey dishes; savoury sauces, pickles, gravies and condiments; cheese; sausages; beef and veal  
6 dishes; biscuits, buns, cakes, fruit pies and pastries<sup>21</sup>. Cheese is one of the top 10 contributors and is  
7 widely consumed. In the UK, cheese production for the 12 months ending April 2013 was 376,350  
8 tonnes,<sup>22</sup> with an average person consuming 9 kg of cheese per year.<sup>21</sup> Cheese is an important  
9 contributor of salt intake. In the UK, milk and milk products are estimated to contribute about 9% of  
10 salt intake, with cheeses accounting for 44% of the salt consumption in this category and the  
11 percentage has not decreased over the last 10 years.<sup>17 21</sup> Cheese also contributes to salt intake in many  
12 other countries such as United States (3.8 - 11%),<sup>23 24</sup> Australia (4 - 7%)<sup>25 26</sup>, New Zealand (2.8%)<sup>27</sup>  
13 and Canada (3.2 - 5.4%).<sup>28 29</sup>

14  
15  
16  
17  
18  
19  
20  
21  
22  
23  
24  
25  
26  
27  
28  
29  
30  
31  
32  
33  
34  
35  
36  
37  
38  
39  
40  
41  
42  
43  
44  
45  
46  
47  
48  
49  
50  
51  
52  
53  
54  
55  
56  
57  
58  
59  
60  
Cheese is heavily marketed for its high calcium content, particularly to children.<sup>30</sup> But as cheese is  
high in salt and salt intake is the main factor increasing calcium excretion in the urine<sup>31</sup>, this claimed  
benefit requires more evidence to show the effect of cheese on the net calcium balance. Cheese is  
also a major contributor to fat and saturated fat intake in the UK diet, 6% and 10% respectively.<sup>21</sup>

Very little work has been conducted looking at the salt content of cheese in the UK. This research was  
carried out to evaluate the salt content listed on the labels of cheese products sold in the UK, report  
the variability in salt level and assess the salt levels in relation to the Department of Health 2012 salt  
reduction targets.

## METHODS

### Data Collection

The data was collected from product packaging and nutrient information panels. The survey was  
designed as a comprehensive survey of all cheeses available in a snapshot in time, using one large  
outlet per each of the 7 main retailers in the UK.

For each cheese, the data collected included the company name, product name, pack weight, serving  
size, sodium/salt per 100 grams and sodium/salt per portion. When there were missing figures, they  
were calculated where possible, e.g. the missing sodium or salt values were converted by multiplying  
by 2.5 (sodium to salt) or dividing by 2.5 (salt to sodium). All data was double checked after entry,  
and a further 5% of entries were checked against the original source in a random selection of  
products.

1  
2  
3 *Inclusion/exclusion criteria:* Data were collected from each of the major UK supermarkets (Asda,  
4 Sainsbury's, Tesco, Waitrose, Morrisons, The Co-operative and Marks and Spencer) to represent salt  
5 levels of cheese in the UK. Data were collected for supermarket own brand and branded cheese  
6 products available. However, due to resource restrictions only the data for cheddar and cheddar style  
7 cheese products were collected from Morrisons. Packaged cheese products with salt or sodium  
8 information labeled were included. Cheese products with other food components such as  
9 biscuits/crackers or ham were excluded, with the exception of Cottage cheese, cream cheese and  
10 Wensleydale traditionally produced with fruits or vegetables. Also, cheese products that contained  
11 two different types of cheese were excluded such as a product of grated mozzarella and Cheddar  
12 cheese and a Torta con Gorgonzola which is blend of Mascarpone and layered Gorgonzola cheese.  
13 When two sizes were available, the standard weight was used. Cheese types with a sample size less  
14 than 8 products with nutrient information on the packaging, found across the different supermarkets,  
15 were excluded; Jarlsberg (4 products), Mascarpone (5), Lancashire (2), Leerdammer (4), Maasdam  
16 (2), sheep, Appenzeller (1), Bavarian Smoked (1) and Ricotta (2).  
17  
18  
19  
20  
21  
22  
23  
24  
25

26 *Product categories:* Products were categorised into the following types of cheese: Brie, Camembert,  
27 Cheddar and Cheddar style, Cheshire, Cottage cheese (plain and with pineapple, chilli, pepper, onion  
28 and chives), Cream cheese (plain and with garlic, herbs, chilli, onion and chives), Double Gloucester,  
29 Edam, Emmental, Feta, Goat's cheese, Blue cheese (produced in the UK), other blue cheese (not  
30 produced in the UK), Gouda, Gruyere, Halloumi, Mozzarella, Parmesan (Grana Padano, Parmigiano  
31 Reggiano and Perorino Romano), Red Leicester, Wensleydale (plain and with fruits), Spread and  
32 other processed cheese (included singles and string cheeses). This was partially based on the criteria  
33 set by the UK Department of Health for the cheese salt reduction targets. The data was also  
34 categorised separately into supermarket own brand and branded and hard pressed with and without  
35 salt reduction targets and blue cheese with and without salt targets. The hard pressed cheese category  
36 included the following cheese types; Emmental, Wensleydale, Cheshire, hard Mozzarella  
37 Gruyere, Red Leicester, Double Gloucester, Cheddar /Cheddar style, Parmesan, Gouda, Edam and  
38 Halloumi. The blue cheese category included blue cheese produced in the UK and imported into the  
39 UK.  
40  
41  
42  
43  
44  
45  
46  
47  
48

## 49 **Statistical analysis**

### 50 *Comparison among products:*

51  
52  
53 Independent Samples T Test was used to compare the levels of salt between supermarket own brand  
54 and branded products, and hard pressed with and without salt reduction targets and blue cheese with  
55  
56  
57  
58  
59  
60

1  
2  
3 and without salt targets and cheddar cheese with and without salt targets.  
4

5  
6 Data are reported as mean, SD, range as indicated. Significance in all tests carried out was deemed  
7 significant as being  $p < 0.05$ . All data were analysed using SPSS .  
8  
9

10  
11 *Salt targets:* For each cheese type, we calculated the total number and percentage of products that met  
12 the Department of Health's 2012 salt target for cheese. We used Chi-square test to compare the  
13 proportion of supermarket own brand and branded products for Cheddar and Cheddar style cheese  
14 that met the Department of Health's 2012 salt targets.  
15  
16

## 17 18 **RESULTS**

19  
20  
21 A total of 612 cheese products met the inclusion criteria and were included in our analysis.  
22  
23

### 24 **Within each type of cheese analysis**

25  
26  
27 Figure 1 shows the salt level in different types of cheeses per 100g. Salt content in cheese was high  
28 and there was a large variation in salt content between different types of cheeses and within the same  
29 type of cheese. On average, eight out of 23 types of cheese contain more than 2g of salt per 100g;  
30 Halloumi ( $2.71 \pm 0.34$ g/100g) and imported blue cheese ( $2.71 \pm 0.83$ g/100g) contained the highest  
31 amounts of salt. Whereas, only three types of cheeses contained less than 1g of salt per 100g; Cottage  
32 cheese (0.55g) contained the lowest amount of salt.  
33  
34  
35  
36  
37

38 Table 1 compares the salt levels for each type of cheese between supermarket and branded products.  
39 10 out of the 23 types of cheeses had a large enough sample size to analyse further, of these, seven  
40 showed a higher salt level in branded than supermarket own brand products and three showed that  
41 supermarket own products had a higher salt level.  
42  
43  
44

45 Cheddar and Cheddar style cheese is the major type of cheese in the UK and has the highest number  
46 of products in our analysis. The salt level in branded Cheddar and Cheddar style was 3.5% higher than  
47 supermarket own brand ( $p < 0.001$ ) (figure 2).  
48  
49  
50

### 51 **Comparing with the 2012 targets**

52  
53 Among 23 types of cheese, 10 types had salt targets and 13 did not have targets. Overall, cheeses with  
54 targets had significantly lower levels of salt compared to those without targets (Table 2). Hard pressed  
55  
56  
57

1  
2  
3 cheese and blue cheeses with targets also had significantly lower levels of salt compared to those  
4 without targets (Table 2).  
5  
6

7  
8 Table 3 shows the cheese products meeting the Department of Health 2012 salt targets. Within each  
9 cheese category, the average salt level was lower in products that met the targets compared to  
10 products that did not meet the target. Overall, among the 394 cheeses that had salt reduction targets,  
11 84.5% already met their respective 2012 targets. There are three cheese types where all of the  
12 products surveyed have met the 2012 targets (Table 3) and a larger proportion of cheese types are  
13 close to meeting the 2012 targets. However, only Double Gloucester (60%) and other processed  
14 cheeses, includes singles and strings (54.5%) had the lowest proportion of products meeting the  
15 targets.  
16  
17  
18  
19

20  
21 Table 4 compares the supermarket and branded products that met the 2012 targets. A greater number  
22 of supermarket own brand products (90%) compared to branded products (73%) met the target for  
23 Cheddar and Cheddar style cheese (Figure 2).  
24  
25  
26

## 27 DISCUSSION

28 Salt content in cheeses was found to be high and there was a large variation in salt content between  
29 different types of cheeses and within the same type of cheese. In most types of cheese, branded cheese  
30 had a higher salt level compared with supermarket own. Overall, among the 394 cheeses that had salt  
31 reduction targets, 84.5% already met their respective 2012 targets. Furthermore, 90% of supermarket  
32 own brand products met the target for Cheddar and Cheddar style cheese compared to 73% of branded  
33 products.  
34  
35  
36  
37  
38

39 Our finding of a high salt content in cheeses sold in the UK is similar to those observed in the USA,<sup>32</sup>  
40 <sup>33</sup> Australia,<sup>34</sup> France,<sup>35</sup> Belgium,<sup>36</sup> Canada,<sup>37</sup> New Zealand,<sup>38</sup> South Africa<sup>39</sup> and Brazil<sup>40</sup> showing  
41 that high levels of salt in cheese is a global challenge.  
42  
43  
44

45 Salt has been claimed to be important in the flavour, texture, structure, acceptability, shelf-life and  
46 safety of cheese.<sup>41-43</sup> But the development of cheese with lower salt content has been thriving.<sup>44-50</sup>  
47 Studies describing the reduction of salt in Cheddar cheese are limited, despite the importance of this  
48 cheese in the British diet. Those studies that exist involve reducing salt in cheddar cheese<sup>51</sup> or the  
49 addition of other compounds that can function in ways similar to salt (sodium chloride), such as  
50 potassium chloride,<sup>44 52-56</sup> magnesium chloride and calcium chloride.<sup>57 58</sup>  
51  
52  
53  
54  
55  
56  
57  
58  
59  
60

1  
2  
3 Supermarket own brand cheese have been produced with lower levels of salt, which demonstrates that  
4 – despite claims to the contrary - delivering salt reduction appears not to be a technical issue related to  
5 cheese manufacture. Corporate decisions about food composition are often based upon factors such as  
6 common practice, taste and price, rather than health. However, evidence suggests that where salt  
7 reductions are made gradually in products, no change in consumer preference is reported.<sup>59 60</sup>  
8  
9

10  
11  
12 Our paper, using the example of one of the top 10 contributors of salt to the UK diet – cheese,  
13 demonstrates that a national target based approach to reformulation can be a successful method for  
14 reducing the salt content in food. Our findings show that the cheese types with salt targets contained  
15 less salt than cheese types without salt targets, suggest that the targets have helped focus and drive the  
16 manufacturer to reduce their salt levels. There were three cheese types where all of the products  
17 surveyed have met the 2012 targets (Table 3) and a large proportion of cheese types are close to  
18 meeting the 2012 targets. Therefore the Department of Health has recently reset the targets to lower  
19 levels. However, not all cheese types sold in the UK (Appendix 1) have a salt target, unlike in other  
20 countries such as the New York City salt reduction targets, where they have included a target for  
21 parmesan type of cheese.<sup>61</sup> Also, some of UK cheese salt targets are less ambitious when compared  
22 to New York City salt reduction targets, particularly the main target in this food category, which is for  
23 hard pressed cheeses such as Cheddar cheese. In the UK the target is 1.8g/100g but in New York it is  
24 1.58g/100g for 2012 and 1.5g/100g for 2014. Furthermore, the sales weighted mean (1.67g) is lower  
25 than the average found in our study and lower than the UK 2012 salt target. There is a bigger variation  
26 in the cheese types without targets (18-500%); setting an average target (suggest 30% reduction on the  
27 highest available products) would narrow this variability.  
28  
29  
30  
31  
32  
33  
34  
35  
36  
37

### 38 **LIMITATIONS**

39 Our study was based on salt content data provided on cheese packaging labels in store; hence we  
40 relied on the accuracy of the data provided on the label. Therefore, it is assumed that the  
41 manufacturers provide accurate and up to date information in line with EU Regulations. However,  
42 further study should include salt content determined through laboratory analysis to achieve a better  
43 understanding of the true salt content. When collecting data we did not capture ingredients list, this  
44 means we are unable to ascertain if salt has been replaced with any other ingredients/additives in the  
45 cheese that came out lowest. Such data should be collected in future surveys. **Additionally the salt  
46 content of cheese is likely to differ across countries; our data is primarily relevant to the UK.**  
47  
48  
49

50  
51  
52 Nevertheless, the results of this study are relevant and serve to document the salt content of cheese  
53 products sold in UK supermarkets, providing a foundation for future studies and providing  
54 information for programs and the dairy industry to potentially move toward the reformulation of these  
55 products.  
56  
57

## CONCLUSION

This research demonstrates that salt content of cheese in the UK is high and there is a wide variation in the salt content of cheeses and even within the same type of cheeses. Despite this, 84.5% of cheeses already met their respective 2012 targets. These findings demonstrate that much larger reductions in the amount of salt added to cheese could be made and much more challenging targets need to be set.

Other countries around the world now need to follow suit and develop a target based approach to reducing salt content of processed foods. While the food category emphasis may differ between countries, the concept of using salt targets to achieve a 'level playing field' amongst the industry is universal. A product like cheese is widely consumed internationally and this research demonstrates the variability in salt levels within each type and how targets can help to lower the levels of salt.

## AUTHOR CONTRIBUTIONS

GM and KJ conceived the idea and designed research; KH conducted research; KH and FH analysed data; KH wrote the first draft of the manuscript and all authors contributed to the interpretation of the results and revision of the manuscript, and approved the final manuscript. GM had primary responsibility for final content.

Funding: None

## FUNDING STATEMENT

This research received no specific grant from any funding agency in the public, commercial or not-for-profit sectors

## COMPETING INTERESTS

All authors have completed the ICMJE uniform disclosure form at [www.icmje.org/coi\\_disclosure.pdf](http://www.icmje.org/coi_disclosure.pdf) (available on request from the corresponding author) and declare: no support from any organisation for the submitted work; no financial relationships with any organisations that might have an interest in the submitted work in the previous three years. KH and KJ are employees of Consensus Action on Salt & Health (CASH), a nonprofit charitable organisation. FH is a member of CASH and its international branch World Action on Salt & Health (WASH) and does not receive any financial support from CASH or WASH. MacGregor GA is Chairman of Blood Pressure UK (BPUK), Chairman of CASH and Chairman of WASH. BPUK, CASH and WASH are nonprofit charitable organisations. GM does not receive any financial support from any of these organisations.



1  
2  
3  
4 **DATA SHARING STATEMENT**  
5  
6

7 Extra data is available by emailing Kawther Hashem on [k.hashem@qmul.ac.uk](mailto:k.hashem@qmul.ac.uk).  
8  
9

10  
11 **Legend for figure 1: salt levels (g/100g) in each type of cheese**

12 **Legend for figure 2: salt levels (mean  $\pm$  SD) and percentage meeting salt targets in supermarket**  
13 **and branded Cheddar and Cheddar-style cheese**  
14  
15  
16  
17  
18  
19  
20  
21  
22  
23  
24  
25  
26  
27  
28  
29  
30  
31  
32  
33  
34  
35  
36  
37  
38  
39  
40  
41  
42  
43  
44  
45  
46  
47  
48  
49  
50  
51  
52  
53  
54  
55  
56  
57  
58  
59  
60

Table 1 Salt levels (g/100g) for each type of cheese between supermarket and branded products.

| Cheese type            | Supermarket |           | Branded |           |
|------------------------|-------------|-----------|---------|-----------|
|                        | N           | Mean±SD   | N       | Mean±SD   |
| Camembert              | 12          | 1.63±0.16 | 4       | 1.49±0.01 |
| Cheddar /Cheddar style | 187         | 1.72±0.14 | 63      | 1.78±0.13 |
| Other processed        | 14          | 2.48±0.38 | 8       | 2.01±0.44 |
| Cheese Spread          | 7           | 1.89±0.28 | 12      | 1.88±0.31 |
| Cream cheese           | 14          | 0.68±0.24 | 5       | 0.86±0.13 |
| Edam                   | 12          | 2.38±0.28 | 4       | 2.01±0.28 |
| Emmental               | 5           | 0.60±0.14 | 4       | 1.66±0.28 |
| Feta                   | 18          | 2.51±0.58 | 4       | 2.52±0.71 |
| Goat's cheese          | 16          | 1.23±0.40 | 4       | 1.24±0.58 |
| Mozzarella             | 18          | 0.65±0.33 | 4       | 1.16±0.35 |

**Table 2 Salt levels in cheese with and without salt targets (g/100g)**

| Cheese type         | With target |           | Without target |           | p value |
|---------------------|-------------|-----------|----------------|-----------|---------|
|                     | N           | Mean±SD   | N              | Mean±SD   |         |
| <b>All</b>          | 394         | 1.66±0.42 | 218            | 1.78±0.79 | 0.04    |
| <b>Hard pressed</b> | 303         | 1.70±0.20 | 99             | 1.96±0.72 | 0.00    |
| <b>Blue cheese*</b> | 15          | 2.02±0.09 | 13             | 2.71±0.83 | 0.01    |

\* The blue cheese category here included blue cheese produced in the UK and imported into the UK.

Table 3 cheese products meeting the Department of Health 2012 salt targets

| Cheese type                   | 2012 salt target<br>(g/100g) | Number<br>of<br>products | Meeting target |         |                     |
|-------------------------------|------------------------------|--------------------------|----------------|---------|---------------------|
|                               |                              |                          | N              | percent | Mean±SD<br>(g/100g) |
| <b>Cheddar /Cheddar style</b> | 1.8                          | 250                      | 214            | 85.6    | 1.71±0.12           |
| <b>Other processed</b>        | 2                            | 22                       | 12             | 54.5    | 1.93±0.17           |
| <b>Cheese Spread</b>          | 2.25                         | 19                       | 19             | 100     | 1.88±0.29           |
| <b>Cheshire</b>               | 1.8                          | 8                        | 8              | 100     | 1.43 n/a            |
| <b>Cottage cheese</b>         | 0.63                         | 16                       | 14             | 87.5    | 0.51±0.03           |
| <b>Cream cheese</b>           | 0.75                         | 19                       | 14             | 73.7    | 0.61±0.07           |
| <b>Double Gloucester</b>      | 1.8                          | 10                       | 6              | 60.0    | 1.58±0.14           |
| <b>Red Leicester</b>          | 1.80                         | 21                       | 18             | 85.7    | 1.69±0.11           |
| <b>Blue cheese</b>            | 2.10                         | 15                       | 14             | 93.3    | 2.00±0.02           |
| <b>Wensleydale</b>            | 1.80                         | 14                       | 14             | 100     | 1.13 n/a            |
| <b>Overall</b>                | n/a                          | 394                      | 333            | 84.5%   | 1.61±0.38           |

Table 4 Percentage of supermarket and branded products that meet the 2012 targets

| Cheese type            | 2012 salt target<br>(g/100g) | Meeting target |                 |    |             |
|------------------------|------------------------------|----------------|-----------------|----|-------------|
|                        |                              | N              | Supermarket (%) | N  | Branded (%) |
| Cheddar /Cheddar style | 1.8                          | 168            | 90              | 46 | 73          |
| Other processed        | 2.0                          | 5              | 36              | 7  | 88          |
| Cheese Spread          | 2.25                         | 7              | 100             | 12 | 100         |
| Cheshire               | 1.8                          | 8              | 100             | 0  | n/a         |
| Cottage cheese         | 0.63                         | 14             | 93              | 0  | n/a         |
| Cream cheese           | 0.75                         | 12             | 86              | 2  | 40          |
| Double Gloucester      | 1.8                          | 6              | 100             | 0  | n/a         |
| Red Leicester          | 1.8                          | 17             | 85              | 1  | 100         |
| Blue cheese            | 2.1                          | 12             | 92              | 2  | 100         |
| Wensleydale            | 1.8                          | 13             | 100             | 1  | 100         |

## REFERENCE

1. He FJ, MacGregor GA. Reducing population salt intake worldwide: from evidence to implementation. *Prog Cardiovasc Dis* 2010;52:363-82.
2. He FJ, MacGregor GA. Salt reduction lowers cardiovascular risk: meta-analysis of outcome trials. *Lancet* 2011;378:380-2.
3. D'Elia L, Rossi G, Ippolito R, Cappuccio FP, Strazzullo P. Habitual salt intake and risk of gastric cancer: a meta-analysis of prospective studies. *Clin Nutr* 2012;31:489-98.
4. Devine A, Criddle RA, Dick IM, Kerr DA, Prince RL. A longitudinal study of the effect of sodium and calcium intakes on regional bone density in postmenopausal women. *The American journal of clinical nutrition* 1995;62:740-5.
5. He FJ, Marrero NM, MacGregor GA. Salt intake is related to soft drink consumption in children and adolescents: A link to obesity? *Hypertension* 2008;51:E55-E55.
6. Asaria P, Chisholm D, Mathers C, Ezzati M, Beaglehole R. Chronic disease prevention: health effects and financial costs of strategies to reduce salt intake and control tobacco use. *Lancet* 2007;370:2044-53.
7. Webster JL, Dunford EK, Hawkes C, Neal BC. Salt reduction initiatives around the world. *J Hypertens* 2011;29:1043-50.
8. Beaglehole R, Bonita R, Horton R, Adams C, Alleyne G, Asaria P, et al. Priority actions for the non-communicable disease crisis. *Lancet* 2011;377:1438-47.
9. SIXTY-SIXTH WORLD HEALTH ASSEMBLY. Follow-up to the Political Declaration of the High-level Meeting of the General Assembly on the Prevention and Control of Non-communicable Diseases. . [http://apps.who.int/gb/ebwha/pdf\\_files/WHA66/A66\\_R10-en.pdf](http://apps.who.int/gb/ebwha/pdf_files/WHA66/A66_R10-en.pdf) (accessed 26 September 2013).
10. Winkler JT. Obesity expose offers slim pickings. *Bmj* 2012;345:e4465-e65.
11. Salt reduction targets: March 2006. London, UK: Food Standards Agency. 2006. <http://www.food.gov.uk/multimedia/pdfs/salttargetsapril06.pdf> (accessed 29 July 2013).
12. Food Standards Agency. Agency Publishes 2012 salt reduction targets, 8 May 2009. [www.food.gov.uk/news/newsarchive/2009/may/salttargets](http://www.food.gov.uk/news/newsarchive/2009/may/salttargets) (accessed 29 July 2013).
13. Department of Health Responsibility Deal, 27 July 2012. <https://responsibilitydeal.dh.gov.uk/pledges/pledge/?pl=9> (accessed 29 July 2013).
14. He FJ, Brinsden HC, Macgregor GA. Salt reduction in the United Kingdom: a successful experiment in public health. *Journal of human hypertension* 2014;28:345-52.
15. Brinsden HC, He FJ, Jenner KH, Macgregor GA. Surveys of the salt content in UK bread: progress made and further reductions possible. *BMJ open* 2013;3.
16. Department of Health: Assessment of Dietary Sodium Levels Among Adults (aged 19-64) in England, 2011 <http://transparency.dh.gov.uk/2012/06/21/sodium-levels-among-adults/> (accessed 29 July 2013).
17. Henderson L IK, Gregory J, Bates CJ, Prentice A, Perks J, et al. *National Diet & Nutrition Survey: Adults aged 19 to 64*: London: TSO, 2003.

18. He FJ, Pombo-Rodrigues S, Macgregor GA. Salt reduction in England from 2003 to 2011: its relationship to blood pressure, stroke and ischaemic heart disease mortality. *BMJ open* 2014;4:e004549.
19. National Institute for Health and Clinical Excellence (NICE). Guidance on the prevention of cardiovascular disease at the population level. . <http://guidance.nice.org.uk/PH25> (accessed 26 September 2013).
20. James WP, Ralph A, Sanchez-Castillo CP. The dominance of salt in manufactured food in the sodium intake of affluent societies. *Lancet* 1987;1:426-9.
21. National Diet and Nutrition Survey: Headline results from Years 1 and 2 (combined) of the rolling programme 2008/9 - 2009/10. [https://www.gov.uk/government/uploads/system/uploads/attachment\\_data/file/216485/dh\\_128556.pdf](https://www.gov.uk/government/uploads/system/uploads/attachment_data/file/216485/dh_128556.pdf) (accessed 11 November 2013).
22. DairyCo. <http://www.dairyco.org.uk/market-information/processing-trade/dairy-product-production/uk-dairy-product-production/>.
23. Sodium Intake Among Adults --- United States, 2005-2006. [http://www.cdc.gov/mmwr/preview/mmwrhtml/mm5924a4.htm?s\\_cid=mm5924a4\\_e%0D%0A](http://www.cdc.gov/mmwr/preview/mmwrhtml/mm5924a4.htm?s_cid=mm5924a4_e%0D%0A).
24. CDC. Centers for disease control and prevention: vital signs: food categories contributing the most to sodium consumption— United States, 2007–2008. *MMWR Morb Mortal Wkly Rep* 2012;61:92–8.
25. Grimes CA, Campbell KJ, Riddell LJ, Nowson CA. Sources of sodium in Australian children's diets and the effect of the application of sodium targets to food products to reduce sodium intake. *Br J Nutr* 2011;105:468-77.
26. Charlton K, Yeatman H, Houweling F, Guenon S. Urinary sodium excretion, dietary sources of sodium intake and knowledge and practices around salt use in a group of healthy Australian women. *Aust N Z J Public Health* 2010;34:356-63.
27. Ministry of Health and the University of Auckland. Nutrition and the burden of disease: New Zealand 1997–2011. Wellington: Ministry of Health, 2003. . [http://www.moh.govt.nz/notebook/nbbooks.nsf/0/A8D85BC5BAD17610CC256D970072A0A/\\$file/](http://www.moh.govt.nz/notebook/nbbooks.nsf/0/A8D85BC5BAD17610CC256D970072A0A/$file/).
28. Garriguet D. Sodium consumption at all ages <http://www.statcan.gc.ca/pub/82-003-x/2006004/article/sodium/4148995-eng.htm>.
29. Fischer PWF, Vigneault M, Huang R, Arvaniti K, Roach P. Sodium food sources in the Canadian diet. *Applied Physiology Nutrition and Metabolism-Physiologie Appliquee Nutrition Et Metabolisme* 2009;34:884-92.
30. Aktas Arnas Y. The effects of television food advertisement on children's food purchasing requests. *Pediatr Int* 2006;48:138-45.
31. Cappuccio FP, Kalaitzidis R, Duneclift S, Eastwood JB. Unravelling the links between calcium excretion, salt intake, hypertension, kidney stones and bone metabolism. *J Nephrol* 2000;13:169-77.
32. Agarwal S, McCoy D, Graves W, Gerard PD, Clark S. Sodium content in retail Cheddar, Mozzarella, and process cheeses varies considerably in the United States. *J Dairy Sci* 2011;94:1605-15.
33. Moshfegh AJ, Holden, J. M., Cogswell, M. E., Kuklina, E. V., Patel, S. M., Gunn, J. P., Gillespie C, Hong, Y., Merritt, R., & Galuska, D. A. Vital signs: food categories contributing the most to sodium consumption - United States, 2007-2008. *MMWR Morb Mortal Wkly Rep* 2012;61:92-8.
34. Grimes CA, Nowson CA, Lawrence M. An evaluation of the reported sodium content of Australian food products. *International Journal of Food Science and Technology* 2008;43:2219-29.

- 1
- 2
- 3 35. Chekri R, Noel L, Millour S, Vastel C, Kadar A, Sirot V, et al. Calcium, magnesium, sodium and
- 4 potassium levels in foodstuffs from the second French Total Diet Study. *Journal of Food*
- 5 *Composition and Analysis* 2012;25:97-107.
- 6 36. Huybrechts I, De Keyzer W, Lin Y, Vandevijvere S, Vereecken C, Van Oyen H, et al. Food sources
- 7 and correlates of sodium and potassium intakes in Flemish pre-school children. *Public Health*
- 8 *Nutr* 2012;15:1039-46.
- 9 37. Tanase CM, Griffin P, Koski KG, Cooper MJ, Cockell KA. Sodium and potassium in composite food
- 10 samples from the Canadian Total Diet Study. *Journal of Food Composition and Analysis*
- 11 2011;24:237-43.
- 12 38. Thomson BM, Vannoort RW, Haslemore RM. Dietary exposure and trends of exposure to
- 13 nutrient elements iodine, iron, selenium and sodium from the 2003-4 New Zealand Total
- 14 Diet Survey. *Br J Nutr* 2008;99:614-25.
- 15 39. Charlton KE, Steyn K, Levitt NS, Zulu JV, Jonathan D, Veldman FJ, et al. Diet and blood pressure in
- 16 South Africa: Intake of foods containing sodium, potassium, calcium, and magnesium in
- 17 three ethnic groups. *Nutrition* 2005;21:39-50.
- 18 40. Felicio TL, Esmerino EA, Cruz AG, Nogueira LC, Raices RSL, Deliza R, et al. Cheese. What is its
- 19 contribution to the sodium intake of Brazilians? *Appetite* 2013;66:84-88.
- 20 41. Pastorino AJ, Hansen CL, McMahon DJ. Effect of salt on structure-function relationships of
- 21 cheese. *J Dairy Sci* 2003;86:60-9.
- 22 42. Ilhak OI, Oksuztepe G, Calicioglu M, Patir B. Effect of Acid Adaptation and Different Salt
- 23 Concentrations on Survival of *Listeria Monocytogenes* in Turkish White Cheese. *Journal of*
- 24 *Food Quality* 2011;34:379-85.
- 25 43. Shrestha S, Grieder JA, McMahon DJ, Nummer BA. Survival of *Salmonella* Serovars Introduced as
- 26 a Post-Aging Contaminant during Storage of Low-Salt Cheddar Cheese at 4, 10, and 21
- 27 degrees C. *Journal of Food Science* 2011;76:M616-M21.
- 28 44. Grummer J, Bobowski N, Karalus M, Vickers Z, Schoenfuss T. Use of potassium chloride and flavor
- 29 enhancers in low sodium Cheddar cheese. *Journal of Dairy Science* 2013;96:1401-18.
- 30 45. Ayyash MM, Sherkat F, Shah NP. Effect of partial NaCl substitution with KCl on the texture
- 31 profile, microstructure, and sensory properties of low-moisture mozzarella cheese. *Journal*
- 32 *of Dairy Research* 2013;80:7-13.
- 33 46. Karimi R, Mortazavian AM, Karami M. Incorporation of *Lactobacillus casei* in Iranian ultrafiltered
- 34 Feta cheese made by partial replacement of NaCl with KCl. *Journal of Dairy Science*
- 35 2012;95:4209-22.
- 36 47. Ayyash MM, Shah NP. The effect of substitution of NaCl with KCl on chemical composition and
- 37 functional properties of low-moisture Mozzarella cheese. *Journal of Dairy Science*
- 38 2011;94:3761-68.
- 39 48. Ayyash MM, Shah NP. Effect of Partial Substitution of NaCl with KCl on Proteolysis of Halloumi
- 40 Cheese. *Journal of Food Science* 2011;76:C31-C37.
- 41 49. Gomes AP, Cruz AG, Cadena RS, Celeghini RMS, Faria JAF, Bolini HMA, et al. Manufacture of low-
- 42 sodium Minas fresh cheese: Effect of the partial replacement of sodium chloride with
- 43 potassium chloride. *Journal of Dairy Science* 2011;94:2701-06.
- 44 50. Van Dender AGF, Spadoti LM, Zacarchenco PB, Trento FKHS, Alves ATS, Mendes TQ, et al.
- 45 Optimisation of the manufacturing of processed cheese without added fat and reduced
- 46 sodium. *Australian Journal of Dairy Technology* 2010;65:217-21.
- 47 51. Rulikowska A, Kilcawley KN, Doolan IA, Alonso-Gomez M, Nongonierma AB, Hannon JA, et al. The
- 48 impact of reduced sodium chloride content on Cheddar cheese quality. *International Dairy*
- 49 *Journal* 2013;28:45-55.
- 50 52. Hystead E, Diez-Gonzalez F, Schoenfuss TC. The effect of sodium reduction with and without
- 51 potassium chloride on the survival of *Listeria monocytogenes* in Cheddar cheese. *J Dairy Sci*
- 52 2013.
- 53
- 54
- 55
- 56
- 57
- 58
- 59
- 60



- 1  
2  
3 53. Lu Y. "Effects of sodium chloride salting and substitution with potassium chloride on whey  
4 expulsion of cheese" All Graduate Theses and Dissertations. Paper 1285. 2012.  
5 <http://digitalcommons.usu.edu/etd/1285>.  
6  
7 54. Lindsay RC, Hargett SM, Bush CS. Effect of Sodium-Potassium (1 - 1) Chloride and Low Sodium-  
8 Chloride Concentrations on Quality of Cheddar Cheese. Journal of Dairy Science  
9 1982;65:360-70.  
10 55. Reddy KA, Marth EH. Microflora of Cheddar Cheese Made with Sodium-Chloride, Potassium-  
11 Chloride, or Mixtures of Sodium and Potassium-Chloride. Journal of Food Protection  
12 1995;58:54-61.  
13 56. Reddy KA, Marth EH. Lactic-Acid Bacteria in Cheddar-Cheese Made with Sodium-Chloride,  
14 Potassium-Chloride or Mixtures of the 2 Salts. Journal of Food Protection 1995;58:62-69.  
15 57. Grummer J, Karalus M, Zhang K, Vickers Z, Schoenfuss TC. Manufacture of reduced-sodium  
16 Cheddar-style cheese with mineral salt replacers. Journal of Dairy Science 2012;95:2830-39.  
17 58. Fitzgerald E, Buckley J. Effect of Total and Partial Substitution of Sodium-Chloride on the Quality  
18 of Cheddar Cheese. Journal of Dairy Science 1985;68:3127-34.  
19 59. Girgis S, Neal B, Prescott J, Prendergast J, Dumbrell S, Turner C, et al. A one-quarter reduction in  
20 the salt content of bread can be made without detection. Eur J Clin Nutr 2003;57:616-20.  
21 60. Liem DG, Miremadi F, Keast RS. Reducing sodium in foods: the effect on flavor. Nutrients  
22 2011;3:694-711.  
23 61. National Salt Reduction Initiative packed food categories and targets  
24 <http://www.nyc.gov/html/doh/downloads/pdf/cardio/packaged-food-targets.pdf> (accessed  
25 28th August 2013).  
26  
27  
28  
29  
30  
31  
32  
33  
34  
35  
36  
37  
38  
39  
40  
41  
42  
43  
44  
45  
46  
47  
48  
49  
50  
51  
52  
53  
54  
55  
56  
57  
58  
59  
60

## APPENDIX 1. 2012 salt reduction targets for cheeses

| Cheese type                                                                                                                                                                                                                                                                                         | Salt/100g                          |
|-----------------------------------------------------------------------------------------------------------------------------------------------------------------------------------------------------------------------------------------------------------------------------------------------------|------------------------------------|
| <b>Cheddar and other similar "hard pressed" cheeses</b><br>e.g. Cheshire, Lancashire, Wensleydale, Caerphilly, Double Gloucester, Leicester, Derby etc, including mild, medium or mature and those products where levels of fat have been reduced                                                   | 1.8 (average r)                    |
| <b>"Fresh" cheeses</b><br>Excludes fromage frais as no salt is added to this product. Also excludes Brie, Camembert and other similar soft rinded cheeses.<br>4.2.1 Soft white cheese e.g. Philadelphia - Includes all soft white cheese, flavoured or unflavoured, including reduced fat products. | 0.55 (average r)<br>0.75 (maximum) |
| <b>Cottage cheese, plain Includes all unflavoured cottage cheese.</b><br>Excludes flavoured products<br>Cottage cheese, flavoured Includes all flavoured cottage cheese (onion and chive, pineapple)                                                                                                | 0.55 (average r)<br>0.63 (maximum) |
| <b>Mozzarella (used in food products)</b><br>Includes mozzarella products for food industry use only. Excludes fresh mozzarella sold in retail outlets.                                                                                                                                             | 1.5 (average p)                    |
| <b>Blue cheese</b><br>UK produced blue cheeses only                                                                                                                                                                                                                                                 | 2.1 (average p)                    |
| <b>Processed Cheese</b><br><b>Cheese spreads</b>                                                                                                                                                                                                                                                    | 1.63 (average r)<br>2.25 (maximum) |
| <b>Other processed cheese (e.g. slices, strings, etc.)</b>                                                                                                                                                                                                                                          | 2.0 (average r)                    |

1  
2  
3  
4  
5  
6  
7  
8  
9  
10  
11  
12  
13  
14  
15  
16  
17  
18  
19  
20  
21  
22  
23  
24  
25  
26  
27  
28  
29  
30  
31  
32  
33  
34  
35  
36  
37  
38  
39  
40  
41  
42  
43  
44  
45  
46  
47  
48  
49  
50  
51  
52  
53  
54  
55  
56  
57  
58  
59  
60

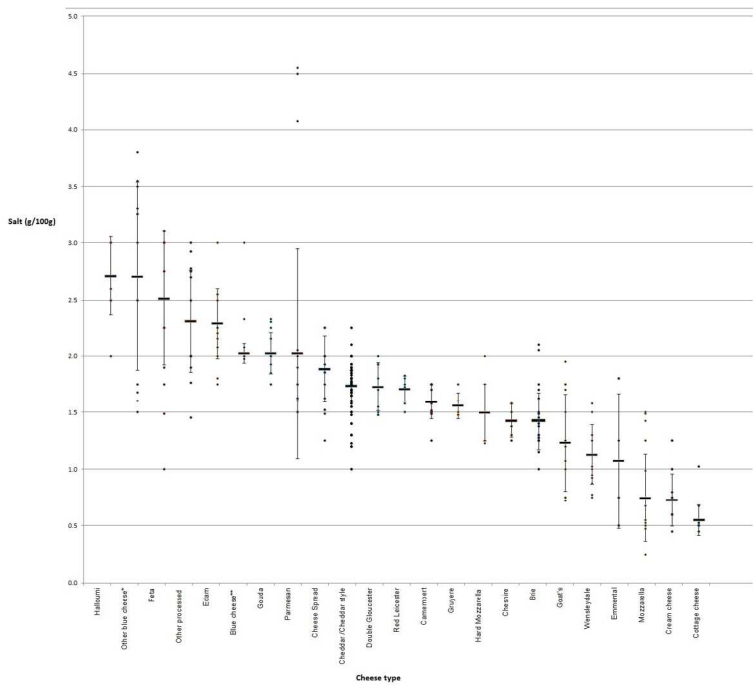

Figure 1 salt levels in each type of cheese  
486x335mm (96 x 96 DPI)

view only

1  
2  
3  
4  
5  
6  
7  
8  
9  
10  
11  
12  
13  
14  
15  
16  
17  
18  
19  
20  
21  
22  
23  
24  
25  
26  
27  
28  
29  
30  
31  
32  
33  
34  
35  
36  
37  
38  
39  
40  
41  
42  
43  
44  
45  
46  
47  
48  
49  
50  
51  
52  
53  
54  
55  
56  
57  
58  
59  
60

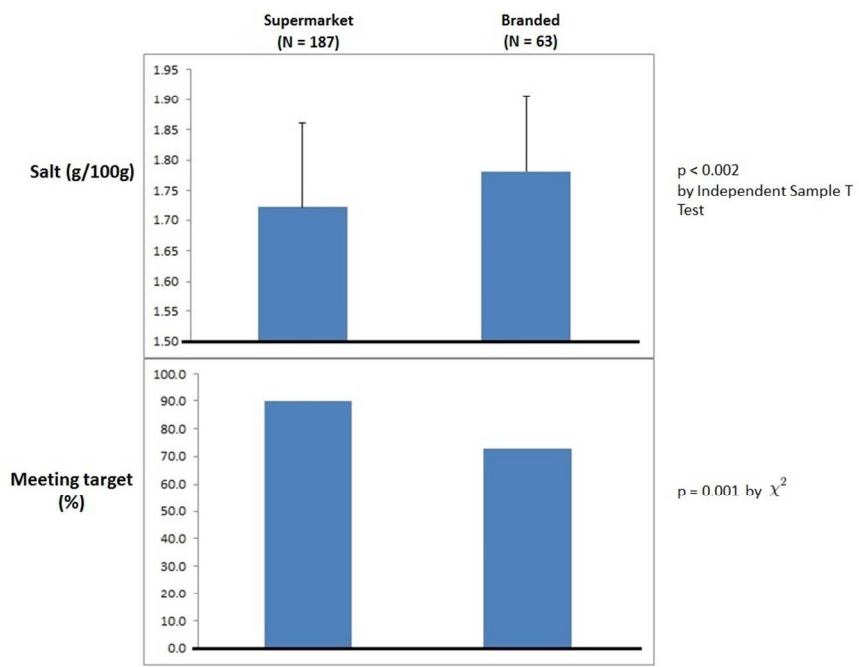

318x222mm (96 x 96 DPI)

view only

## APPENDIX 1. 2012 salt reduction targets for cheeses

| Cheese type                                                                                                                                                                                                                                                                                         | Salt/100g                          |
|-----------------------------------------------------------------------------------------------------------------------------------------------------------------------------------------------------------------------------------------------------------------------------------------------------|------------------------------------|
| <b>Cheddar and other similar "hard pressed" cheeses</b><br>e.g. Cheshire, Lancashire, Wensleydale, Caerphilly, Double Gloucester, Leicester, Derby etc, including mild, medium or mature and those products where levels of fat have been reduced                                                   | 1.8 (average r)                    |
| <b>"Fresh" cheeses</b><br>Excludes fromage frais as no salt is added to this product. Also excludes Brie, Camembert and other similar soft rinded cheeses.<br>4.2.1 Soft white cheese e.g. Philadelphia - Includes all soft white cheese, flavoured or unflavoured, including reduced fat products. | 0.55 (average r)<br>0.75 (maximum) |
| <b>Cottage cheese, plain Includes all unflavoured cottage cheese.</b><br>Excludes flavoured products<br>Cottage cheese, flavoured Includes all flavoured cottage cheese (onion and chive, pineapple)                                                                                                | 0.55 (average r)<br>0.63 (maximum) |
| <b>Mozzarella (used in food products)</b><br>Includes mozzarella products for food industry use only. Excludes fresh mozzarella sold in retail outlets.                                                                                                                                             | 1.5 (average p)                    |
| <b>Blue cheese</b><br>UK produced blue cheeses only                                                                                                                                                                                                                                                 | 2.1 (average p)                    |
| <b>Processed Cheese</b>                                                                                                                                                                                                                                                                             | 1.63 (average r)                   |
| <b>Cheese spreads</b>                                                                                                                                                                                                                                                                               | 2.25 (maximum)                     |
| <b>Other processed cheese (e.g. slices, strings, etc.)</b>                                                                                                                                                                                                                                          | 2.0 (average r)                    |

## STROBE Statement—checklist of items that should be included in reports of observational studies

|                           | Item No | Recommendation                                                                                                                                                                                                                                                                                                                                                                                                                                                         | Page Number Reported |
|---------------------------|---------|------------------------------------------------------------------------------------------------------------------------------------------------------------------------------------------------------------------------------------------------------------------------------------------------------------------------------------------------------------------------------------------------------------------------------------------------------------------------|----------------------|
| <b>Title and abstract</b> | 1       | (a) Indicate the study's design with a commonly used term in the title or the abstract                                                                                                                                                                                                                                                                                                                                                                                 | 2                    |
|                           |         | (b) Provide in the abstract an informative and balanced summary of what was done and what was found                                                                                                                                                                                                                                                                                                                                                                    | 2                    |
| <b>Introduction</b>       |         |                                                                                                                                                                                                                                                                                                                                                                                                                                                                        |                      |
| Background/rationale      | 2       | Explain the scientific background and rationale for the investigation being reported                                                                                                                                                                                                                                                                                                                                                                                   | 4-5                  |
| Objectives                | 3       | State specific objectives, including any prespecified hypotheses                                                                                                                                                                                                                                                                                                                                                                                                       | 2                    |
| <b>Methods</b>            |         |                                                                                                                                                                                                                                                                                                                                                                                                                                                                        |                      |
| Study design              | 4       | Present key elements of study design early in the paper                                                                                                                                                                                                                                                                                                                                                                                                                | 5                    |
| Setting                   | 5       | Describe the setting, locations, and relevant dates, including periods of recruitment, exposure, follow-up, and data collection                                                                                                                                                                                                                                                                                                                                        | 5-6                  |
| Participants              | 6       | (a) <i>Cohort study</i> —Give the eligibility criteria, and the sources and methods of selection of participants. Describe methods of follow-up<br><i>Case-control study</i> —Give the eligibility criteria, and the sources and methods of case ascertainment and control selection. Give the rationale for the choice of cases and controls<br><i>Cross-sectional study</i> —Give the eligibility criteria, and the sources and methods of selection of participants | Not applicable       |
|                           |         | (b) <i>Cohort study</i> —For matched studies, give matching criteria and number of exposed and unexposed<br><i>Case-control study</i> —For matched studies, give matching criteria and the number of controls per case                                                                                                                                                                                                                                                 | Not applicable       |
| Variables                 | 7       | Clearly define all outcomes, exposures, predictors, potential confounders, and effect modifiers. Give diagnostic criteria, if applicable                                                                                                                                                                                                                                                                                                                               | 5-6                  |
| Data sources/measurement  | 8*      | For each variable of interest, give sources of data and details of methods of assessment (measurement). Describe comparability of assessment methods if there is more than one group                                                                                                                                                                                                                                                                                   | 5-6                  |
| Bias                      | 9       | Describe any efforts to address potential sources of bias                                                                                                                                                                                                                                                                                                                                                                                                              | 6                    |
| Study size                | 10      | Explain how the study size was arrived at                                                                                                                                                                                                                                                                                                                                                                                                                              | Not applicable       |
| Quantitative variables    | 11      | Explain how quantitative variables were handled in the analyses. If applicable, describe which groupings were chosen and why                                                                                                                                                                                                                                                                                                                                           | 5-7                  |
| Statistical methods       | 12      | (a) Describe all statistical methods, including those used to control for confounding                                                                                                                                                                                                                                                                                                                                                                                  | 6-7                  |
|                           |         | (b) Describe any methods used to examine subgroups and interactions                                                                                                                                                                                                                                                                                                                                                                                                    | 6                    |
|                           |         | (c) Explain how missing data were addressed                                                                                                                                                                                                                                                                                                                                                                                                                            | 6                    |
|                           |         | (d) <i>Cohort study</i> —If applicable, explain how loss to follow-up was addressed<br><i>Case-control study</i> —If applicable, explain how matching of cases and controls was addressed<br><i>Cross-sectional study</i> —If applicable, describe analytical methods taking                                                                                                                                                                                           | Not applicable       |

|                          |     |                                                                                                                                                                                                              |                |
|--------------------------|-----|--------------------------------------------------------------------------------------------------------------------------------------------------------------------------------------------------------------|----------------|
|                          |     | account of sampling strategy                                                                                                                                                                                 |                |
|                          |     | (e) Describe any sensitivity analyses                                                                                                                                                                        | 6-7            |
| <b>Results</b>           |     |                                                                                                                                                                                                              |                |
| Participants             | 13* | (a) Report numbers of individuals at each stage of study—eg numbers potentially eligible, examined for eligibility, confirmed eligible, included in the study, completing follow-up, and analysed            | Not applicable |
|                          |     | (b) Give reasons for non-participation at each stage                                                                                                                                                         | Not applicable |
|                          |     | (c) Consider use of a flow diagram                                                                                                                                                                           | Not applicable |
| Descriptive data         | 14* | (a) Give characteristics of study participants (eg demographic, clinical, social) and information on exposures and potential confounders                                                                     | 7-8            |
|                          |     | (b) Indicate number of participants with missing data for each variable of interest                                                                                                                          | 7-8            |
|                          |     | (c) <i>Cohort study</i> —Summarise follow-up time (eg, average and total amount)                                                                                                                             | Not applicable |
| Outcome data             | 15* | <i>Cohort study</i> —Report numbers of outcome events or summary measures over time                                                                                                                          | Not applicable |
|                          |     | <i>Case-control study</i> —Report numbers in each exposure category, or summary measures of exposure                                                                                                         | 7-8            |
|                          |     | <i>Cross-sectional study</i> —Report numbers of outcome events or summary measures                                                                                                                           | Not applicable |
| Main results             | 16  | (a) Give unadjusted estimates and, if applicable, confounder-adjusted estimates and their precision (eg, 95% confidence interval). Make clear which confounders were adjusted for and why they were included | 7-8            |
|                          |     | (b) Report category boundaries when continuous variables were categorized                                                                                                                                    | Fig 1          |
|                          |     | (c) If relevant, consider translating estimates of relative risk into absolute risk for a meaningful time period                                                                                             | Not applicable |
| Other analyses           | 17  | Report other analyses done—eg analyses of subgroups and interactions, and sensitivity analyses                                                                                                               | 7-8 & Tab 1-5  |
| <b>Discussion</b>        |     |                                                                                                                                                                                                              |                |
| Key results              | 18  | Summarise key results with reference to study objectives                                                                                                                                                     | 8-9            |
| Limitations              | 19  | Discuss limitations of the study, taking into account sources of potential bias or imprecision. Discuss both direction and magnitude of any potential bias                                                   | 9              |
| Interpretation           | 20  | Give a cautious overall interpretation of results considering objectives, limitations, multiplicity of analyses, results from similar studies, and other relevant evidence                                   | 8-9            |
| Generalisability         | 21  | Discuss the generalisability (external validity) of the study results                                                                                                                                        | 8-9            |
| <b>Other information</b> |     |                                                                                                                                                                                                              |                |
| Funding                  | 22  | Give the source of funding and the role of the funders for the present study and, if applicable, for the original study on which the present article is based                                                | 10             |

\*Give information separately for cases and controls in case-control studies and, if applicable, for exposed and unexposed groups in cohort and cross-sectional studies.

1  
2  
3  
4  
5  
6  
7  
8  
9  
10  
11  
12  
13  
14  
15  
16  
17  
18  
19  
20  
21  
22  
23  
24  
25  
26  
27  
28  
29  
30  
31  
32  
33  
34  
35  
36  
37  
38  
39  
40  
41  
42  
43  
44  
45  
46  
47  
48  
49  
50  
51  
52  
53  
54  
55  
56  
57  
58  
59  
60

**Note:** An Explanation and Elaboration article discusses each checklist item and gives methodological background and published examples of transparent reporting. The STROBE checklist is best used in conjunction with this article (freely available on the Web sites of PLoS Medicine at <http://www.plosmedicine.org/>, Annals of Internal Medicine at <http://www.annals.org/>, and Epidemiology at <http://www.epidem.com/>). Information on the STROBE Initiative is available at [www.strobe-statement.org](http://www.strobe-statement.org).

For peer review only
